# Supplementary material for: Why triage materials with low luminescence quantum efficiency: the use of 35Cbz4BzCN as a universal host for organic light emitting diodes through effective triplet energy transfer
Source: Royal Society of Chemistry journal article supplement (doi:10.1039/d0tc05145d), 2020-12-29
Supplement: d0tc05145d1.pdf [file d0tc05145d1.pdf]

## Electronic Supporting Information

### Why Triage the Materials with Low Luminescence Quantum Efficiency: The Use of 35Cbz4BzCN as a Universal Host for Organic Light Emitting Diode through Effective Triplet Energy Transfer

Yi-Mei Huang<sup>a</sup>, Tse-Ying Chen<sup>d</sup>, Deng-Gao Chen<sup>a</sup>, Hsuan-Chi Liang<sup>a</sup>, Cheng-Ham Wu<sup>a</sup>, Mandy M. Lee<sup>e</sup>, Tien-Lung Chiu<sup>\*,c</sup>, Jiun-Haw Lee<sup>\*,b</sup>, Yu-Cheng Chiu<sup>\*,d</sup>, Pi-Tai Chou<sup>\*,a</sup> and Man-kit Leung<sup>\*</sup>,

a. Department of Chemistry and b. Graduate Institute of Photonics and Optoelectronics, Department of Electrical Engineering, National Taiwan University, Taipei 10617, Taiwan. c. Department of Electrical Engineering, Yuan Ze University, Taoyuan 32003, Taiwan. d. Department of Chemical Engineerin, National Taiwan University of Science and Technology, Taipei 10607, Taiwan. e. Institute of Chemistry, Academia Sinica, Academia Sinica, Taipei 115, Taiwan.

#### Table of Contents

|                                                                                                                                                                                                                                                                                                                                                                                                      |     |
|------------------------------------------------------------------------------------------------------------------------------------------------------------------------------------------------------------------------------------------------------------------------------------------------------------------------------------------------------------------------------------------------------|-----|
| <b>Synthesis</b>                                                                                                                                                                                                                                                                                                                                                                                     | S4  |
| <b>Fig. S1</b> <sup>1</sup> H spectrum of <b>35FBZCN</b> in <i>d</i> <sub>6</sub> -acetone.                                                                                                                                                                                                                                                                                                          | S5  |
| <b>Fig. S2</b> <sup>13</sup> C spectrum of <b>35FBZCN</b> in <i>d</i> <sub>6</sub> -acetone.                                                                                                                                                                                                                                                                                                         | S6  |
| <b>Fig. S3</b> <sup>1</sup> H spectrum of <b>35CbzBZCN</b> in CD <sub>2</sub> Cl <sub>2</sub> .                                                                                                                                                                                                                                                                                                      | S7  |
| <b>Fig. S4</b> <sup>13</sup> C spectrum of <b>35CbzBZCN</b> in CD <sub>2</sub> Cl <sub>2</sub> .                                                                                                                                                                                                                                                                                                     | S8  |
| <b>Fig. S5</b> (a) DSC measurement of <b>35Cbz4BzCN</b> and (b) TGA scanning of <b>35Cbz4BzCN</b> .                                                                                                                                                                                                                                                                                                  | S9  |
| <b>Fig. S6</b> Solvatochromic shifts of <b>35Cbz4BzCN</b> in various solvents: (a) UV absorption; (b) fluorescence spectra; (c) phosphorescence spectra; (d) comparison of the fluorescence and phosphorescence in MeOH.                                                                                                                                                                             | S10 |
| <b>Fig. S7</b> The prompt and delayed photoluminescence (PL) spectra of 35Cbz4BzCN in dichloromethane at 77K. The prompt one is assigned to the fluorescence emission and the delayed one is assigned to the phosphorescence emission. (b) The prompt time resolved PL decay of 35Cbz4BzCN in dichloromethane at 77K.                                                                                | S12 |
| <b>Fig. S8</b> The FL onset of <b>35Cbz4BzCN</b> in (a) 2MeTHF solution; (b) crystals; (c) ground powder of crystals; (d) sublimed solid; (e) ground powder of sublimed solid; (f) the CVD film.                                                                                                                                                                                                     | S13 |
| <b>Fig. S9</b> (Top) Powder X-ray spectrum of the crystallines of <b>35Cbz4BzCN</b> and (bottom) powder X-ray spectrum of the ground powder of <b>35Cbz4BzCN</b> crystals. The loss of the fine diffraction pattern can clearly be observed.                                                                                                                                                         | S14 |
| <b>Fig. S10</b> The photophysical properties of (a) sublimed solid; (b) sublimed solid being ground to powder; and (c) comparison and difference of the phosphorescence between the ground powder of the crystallines and the sublimed solid of <b>35Cbz4BzCN</b> at 77 K. The red-shift mechanofluorochromic effect of the ground crystallines of <b>35Cbz4BzCN</b> is apparently more significant. | S15 |
| <b>Fig S11</b> The two photon excitation measurements of <b>35Cbz4BzCN</b> . (a) Comparison of                                                                                                                                                                                                                                                                                                       |     |

|                                                                                                                                                                                                                                                                                                                                                                                               |     |
|-----------------------------------------------------------------------------------------------------------------------------------------------------------------------------------------------------------------------------------------------------------------------------------------------------------------------------------------------------------------------------------------------|-----|
| the emission spectra of the crystal, crushed crystal, and ground powder, and (b) measurement of the single crystal with difference excitation depth. The red shifts phenomena can still be seen.                                                                                                                                                                                              | S16 |
| <b>Fig. S12</b> The occupied MO levels for <b>35Cbz4BzCN</b> and their spatial distributions calculated by DFT.                                                                                                                                                                                                                                                                               | S17 |
| <b>Fig. S13</b> The unoccupied MO levels for <b>35Cbz4BzCN</b> and their spatial distributions calculated by DFT.                                                                                                                                                                                                                                                                             | S17 |
| <b>Fig. S14</b> The singly occupied MO levels for <b>35Cbz4BzCN</b> and their spatial distributions calculated by DFT at TD/DFT/B3LYP/6-311+g** levels.                                                                                                                                                                                                                                       | S17 |
| <b>Fig. S15</b> CV and DPV for (a) reduction and (b) oxidation scans of <b>35Cbz4BzCN</b> and (c) AC-2 measurement.                                                                                                                                                                                                                                                                           | S19 |
| <b>Fig. S16</b> HOMO and LUMO alignment of <b>35Cbz4BzCN</b> with blue, green and orange red emitters in the electroluminescence device.                                                                                                                                                                                                                                                      | S20 |
| <b>Fig. S17</b> Device performance of the green TADF OLED with different 4CzIPN doping ratio: (a)the J-L-V plots; (b) the current density-current efficiency-power efficiency curve; (c) CIE coordinate; (d) the current density- EQE curve                                                                                                                                                   | S21 |
| <b>Fig. S18</b> Device of the green TADF OLED with different ETL thickness: (a)the J-L-V plots; (b) the current density-current efficiency-power efficiency curve; (c) CIE coordinate; (d) the current density- EQE curve.                                                                                                                                                                    | S23 |
| <b>Fig. S19</b> Device performance of the green TADF OLED with different EML thickness: (a) the J-L-V plots; (b) the current density-current efficiency-power efficiency curve; (c) CIE coordinate; (d) the current density- EQE curve.                                                                                                                                                       | S25 |
| <b>Fig. S20</b> Transient electroluminescence (TrEL) of the Flrpic, 4CzIPN and TXO-TPA doped OLED.                                                                                                                                                                                                                                                                                            | S27 |
| <b>Fig. S21</b> Device characteristics: The <i>J-L-V</i> plots of the blue Flrpic doped <b>35Cbz4BzCN</b> OLEDs (a) non doped; (b) with different Flrpic ratio. The current density-current efficiency-power efficiency curve of the OLEDs (c) non-doped; (d) with different Flric ratio. (e) CIE coordinate and (f) the current density- EQE curve of the OLEDs with different Flrpic ratio. | S28 |
| <b>Fig. S22</b> ETL thickness effects on the performance of the blue Flrpic doped OLEDs: (a)the J-L-V plots; (b) the current density-current efficiency-power efficiency curve; (c) CIE coordinate; (d) the current density- EQE curve.                                                                                                                                                       | S30 |
| <b>Fig. S23</b> HTL thickness effects on the performance of the blue Flrpic doped OLEDs: (a)the J-L-V plots; (b) the current density-current efficiency-power efficiency curve; (c) CIE coordinate; (d) the current density- EQE curve.                                                                                                                                                       | S32 |
| <b>Fig. S24</b> Two-emitting-layer-structure effects on the performance of the blue Flrpic doped OLEDs: (a) the J-L-V plots; (b) the current density-current efficiency-power efficiency curve; (c) CIE coordinate; (d) the current density- EQE curve.                                                                                                                                       | S34 |

|                                                                                                                                                                                                                                                                                                                                 |     |
|---------------------------------------------------------------------------------------------------------------------------------------------------------------------------------------------------------------------------------------------------------------------------------------------------------------------------------|-----|
| <b>Fig. S25</b> TXO-TPA dopant concentration effects on the performance of the red OLEDs (a) the J-L-V plots; (b) the current density-current efficiency-power efficiency curve; (c) CIE coordinate; (d) the current density- EQE curve.                                                                                        | S36 |
| <b>Fig. S26</b> ETL thickness effects on the performance of the red TXO-TPA doped OLEDs (a) the J-L-V plots; (b) the current density-current efficiency-power efficiency curve; (c) CIE coordinate; (d) the current density- EQE curve.                                                                                         | S38 |
| <b>Fig. S27</b> EML thickness effects on the performance of the red TXO-TPA doped OLEDs (a) the J-L-V plots; (b) the current density-current efficiency-power efficiency curve; (c) CIE coordinate; (d) the current density- EQE curve.                                                                                         | S40 |
| <b>Fig. S28</b> The lifetime curve of the devices at 1000 nits.                                                                                                                                                                                                                                                                 | S42 |
| <b>Fig. S29</b> Spectral overlap analysis of <b>35Cz4BzCN</b> with the blue, green, and red emitters of Firpic, 4CzIPN, and TXO-TPA. Since the emission spectrum of <b>35Cz4BzCN's</b> has the $\lambda_{\max}$ longer than 490 nm (2.5 eV), energy transfer through FRET to Firpic and perhaps to 4CzIPN may be less efficient | S43 |
| <b>Table S1</b> Calculated absorption wavelength ( $\lambda_{\text{cal}}$ ), oscillator strength ( $f$ ) and transition character of <b>35Cz4BzCN</b> calculated by TD/DFT/B3LYP/6-311+g**.                                                                                                                                     | S18 |
| <b>Table S2</b> Performance of <b>35Cz4BzCN</b> OLED with different 4CzIPN doping ratio.                                                                                                                                                                                                                                        | S22 |
| <b>Table S3</b> Performance of <b>35Cz4BzCN</b> OLED with different ETL thicknesses                                                                                                                                                                                                                                             | S24 |
| <b>Table S4</b> Performance of <b>35Cz4BzCN</b> OLED with different EML thicknesses                                                                                                                                                                                                                                             | S26 |
| <b>Table S5</b> The decay half-life time of TrEL                                                                                                                                                                                                                                                                                | S27 |
| <b>Table S6</b> Performance of the Firpic doped OLED with different Firpic dopant ratio                                                                                                                                                                                                                                         | S29 |
| <b>Table S7</b> ETL thickness effects on the performance of the blue Firpic doped OLEDs                                                                                                                                                                                                                                         | S31 |
| <b>Table S8</b> HTL thickness effects on the performance of the blue Firpic doped OLEDs                                                                                                                                                                                                                                         | S33 |
| <b>Table S9</b> Performance of 1EML and 2 EML OLEDs                                                                                                                                                                                                                                                                             | S35 |
| <b>Table S10</b> TXO-TPA dopant concentration effects on the performance of the red OLEDs                                                                                                                                                                                                                                       | S37 |
| <b>Table S11</b> ETL thickness effects on the performance of the red TXO-TPA doped OLEDs                                                                                                                                                                                                                                        | S39 |
| <b>Table S12</b> EML thickness effects on the performance of the red TXO-TPA doped OLEDs                                                                                                                                                                                                                                        | S41 |

## Synthesis

### **3,5-difluoro-4-(1-phenyl-1H-benzo[d]imidazol-2-yl)benzonitrile(35F4BzCN)**

3,5-Difluoro-4-formylbenzonitrile (1.67 g, 10 mmol, 1 equiv) and 2-aminodiphenylamine (2.02 g, 11 mmol, 1.1 equiv) were reacted in a solution of DMF (45 mL) and H<sub>2</sub>O (5 mL) at 80 °C under an air atmosphere for 2.5 hours. The solvent was removed by vacuum distillation. The residue was dissolved in dichloromethane and washed with water twice. The organic layer was then dried over anhydrous MgSO<sub>4</sub> and concentrated by rotary evaporation. The crude product was purified by chromatography on silica gel, using hexanes/ethylacetate = 3/1 to 2/1 as eluent to afford essentially pure **35F4BzCN** (0.9 g, 54 %) as a white powder: m.p. 206.0 - 206.5 °C; <sup>1</sup>H NMR (400 MHz, Acetone-d<sub>6</sub>): δ 7.88-7.85 (m, 1 H), 7.71-7.67 (m, 2 H), 7.58-7.49 (m, 3 H), 7.42-7.40 (m, 5 H); <sup>13</sup>C NMR (100 MHz, Acetone-d<sub>6</sub>): δ 162.95 (d, JCF = 7 Hz), 160.4 (d, JCF = 7 Hz), 144.48, 144.41, 137.12, 136.30, 130.70, 130.04, 130.04, 127.28, 125.33, 124.129, 121.25, 117.38, 117.10, 116.89, 111.68; HRMS calcd for C<sub>20</sub>H<sub>11</sub>F<sub>2</sub>N<sub>3</sub> (M+1<sup>+</sup>) 332.0999, obsd 332.0998.

### **3,5-di(9H-carbazol-9-yl)-4-(1-phenyl-1H-benzo[d]imidazol-2-yl)benzonitrile(35Cbz4BzCN)**

To a mixture of carbazole (0.70 g, 4.2 mmol, 1 equiv) and Cs<sub>2</sub>CO<sub>3</sub> (1.42 g, 4.2 mmol, 2.1 equiv) in DMF (6 mL) was added a solution of **35F4BzCN** (0.66 g, 2 mmol, 1 equiv) in DMF (4 mL). The mixture was stirred at 80 °C under argon for 8 hours. Removal of the solvent by vacuum distillation had given a residue that was re-dissolved in DCM and washed with water. The organic layer was then dried over anhydrous MgSO<sub>4</sub> and concentrated by rotary evaporation to give a crude solid that was further purified by liquid chromatography on silica gel, using hexanes/dichloromethane (3/1) as eluent to afford essentially pure **35Cbz4BzCN** (1.01 g, 80%) as a light yellow solid: m.p. 308-308. °C; <sup>1</sup>H NMR (400 MHz, CD<sub>2</sub>Cl<sub>2</sub>) δ 8.02 (d, J = 8 Hz, 4 H), δ 7.92 (s, 2 H), δ 7.58 (d, J = 8 Hz, 2 H), δ 7.38 (t, J = 8 Hz, 2 H), δ 7.26-7.19(m, 7 H), δ 7.03 (t, J = 6.4 Hz, 1 H), δ 6.97-6.86 (m, 6 H), δ 6.65 (d, J = 8 Hz, 1 H), δ 6.43 (d, J = 8 Hz, 2 H); <sup>13</sup>C NMR (100 MHz, CD<sub>2</sub>Cl<sub>2</sub>): δ 144.47, 143.06, 142.23, 142.17, 141.788, 135.79, 135.67, 134.93, 133.82, 129.69, 128.91, 126.56, 126.32, 124.16, 124.08, 122.91, 121.21, 120.72, 120.27, 120.20, 117.05, 116.62, 112.338, 110.703, 110.00; MALDI calcd for C<sub>44</sub>H<sub>27</sub>N<sub>5</sub> (M+1<sup>+</sup>) 626.2345 (100%), obsd 626.2364.

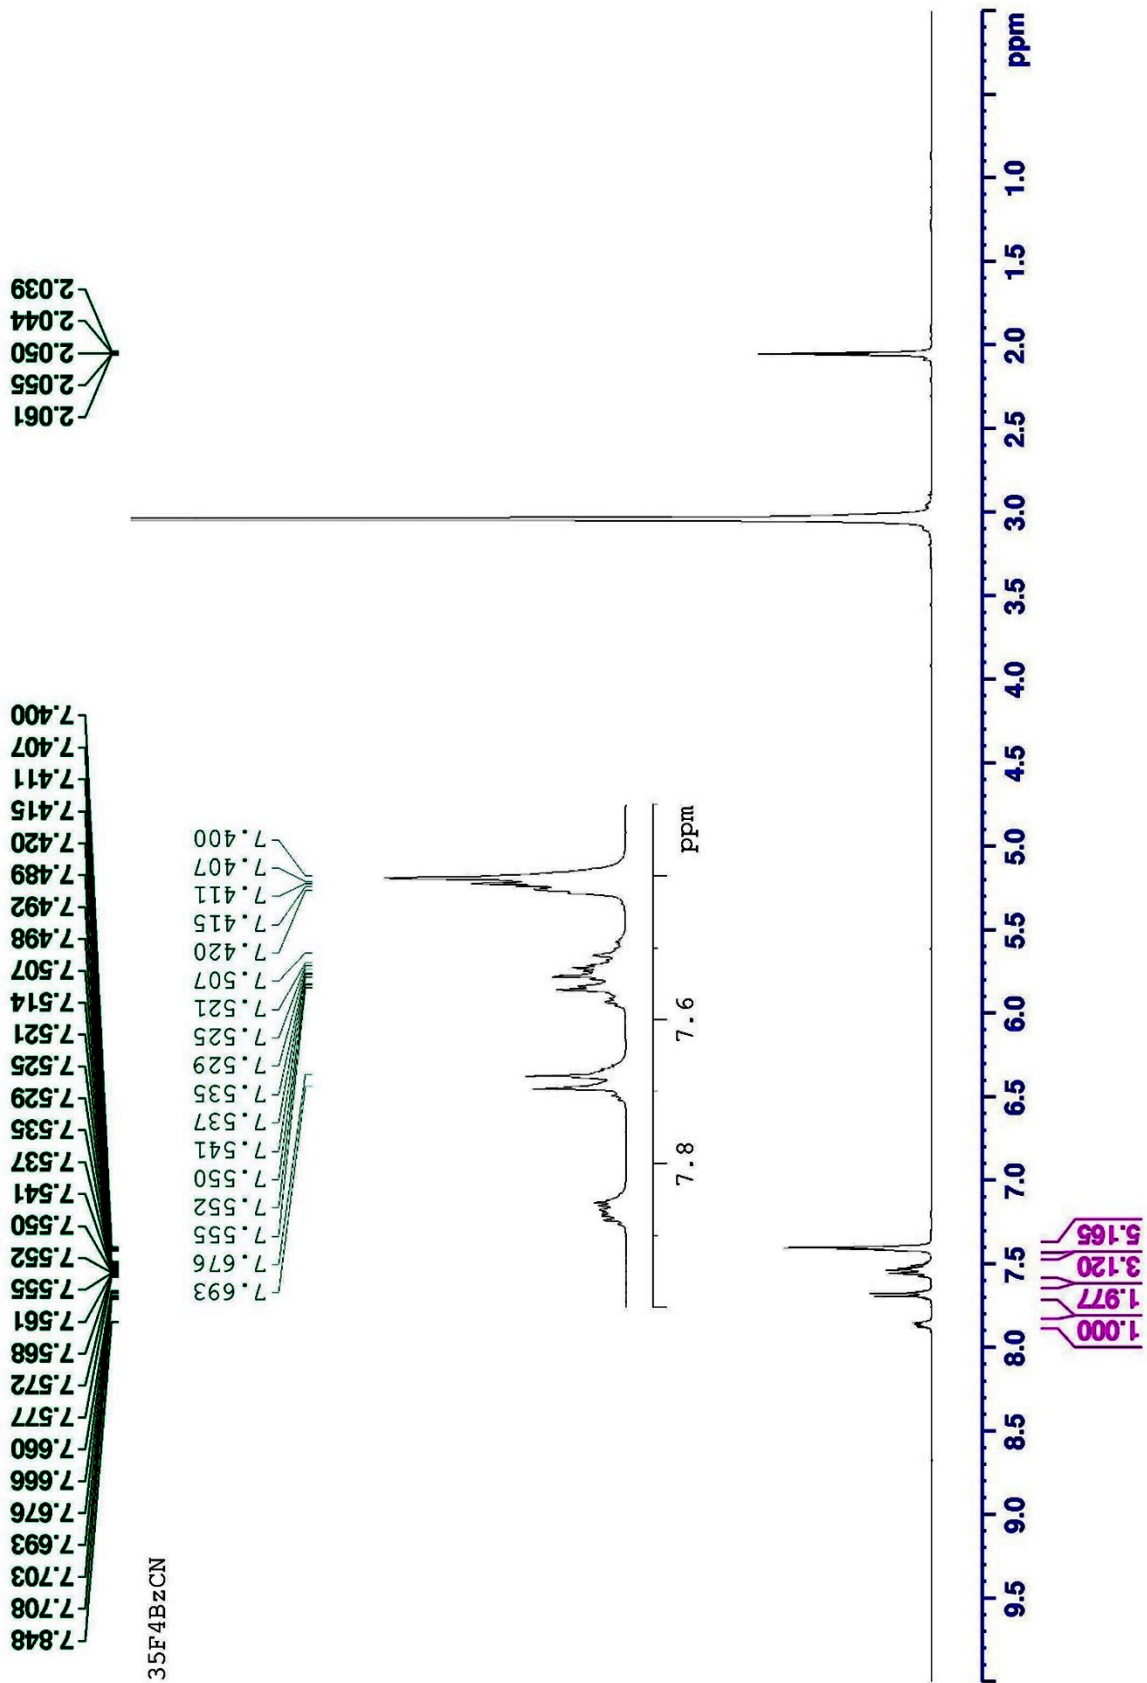

Fig. S1  $^1\text{H}$  spectrum of **35F4BzCN** in  $d_6$ -acetone

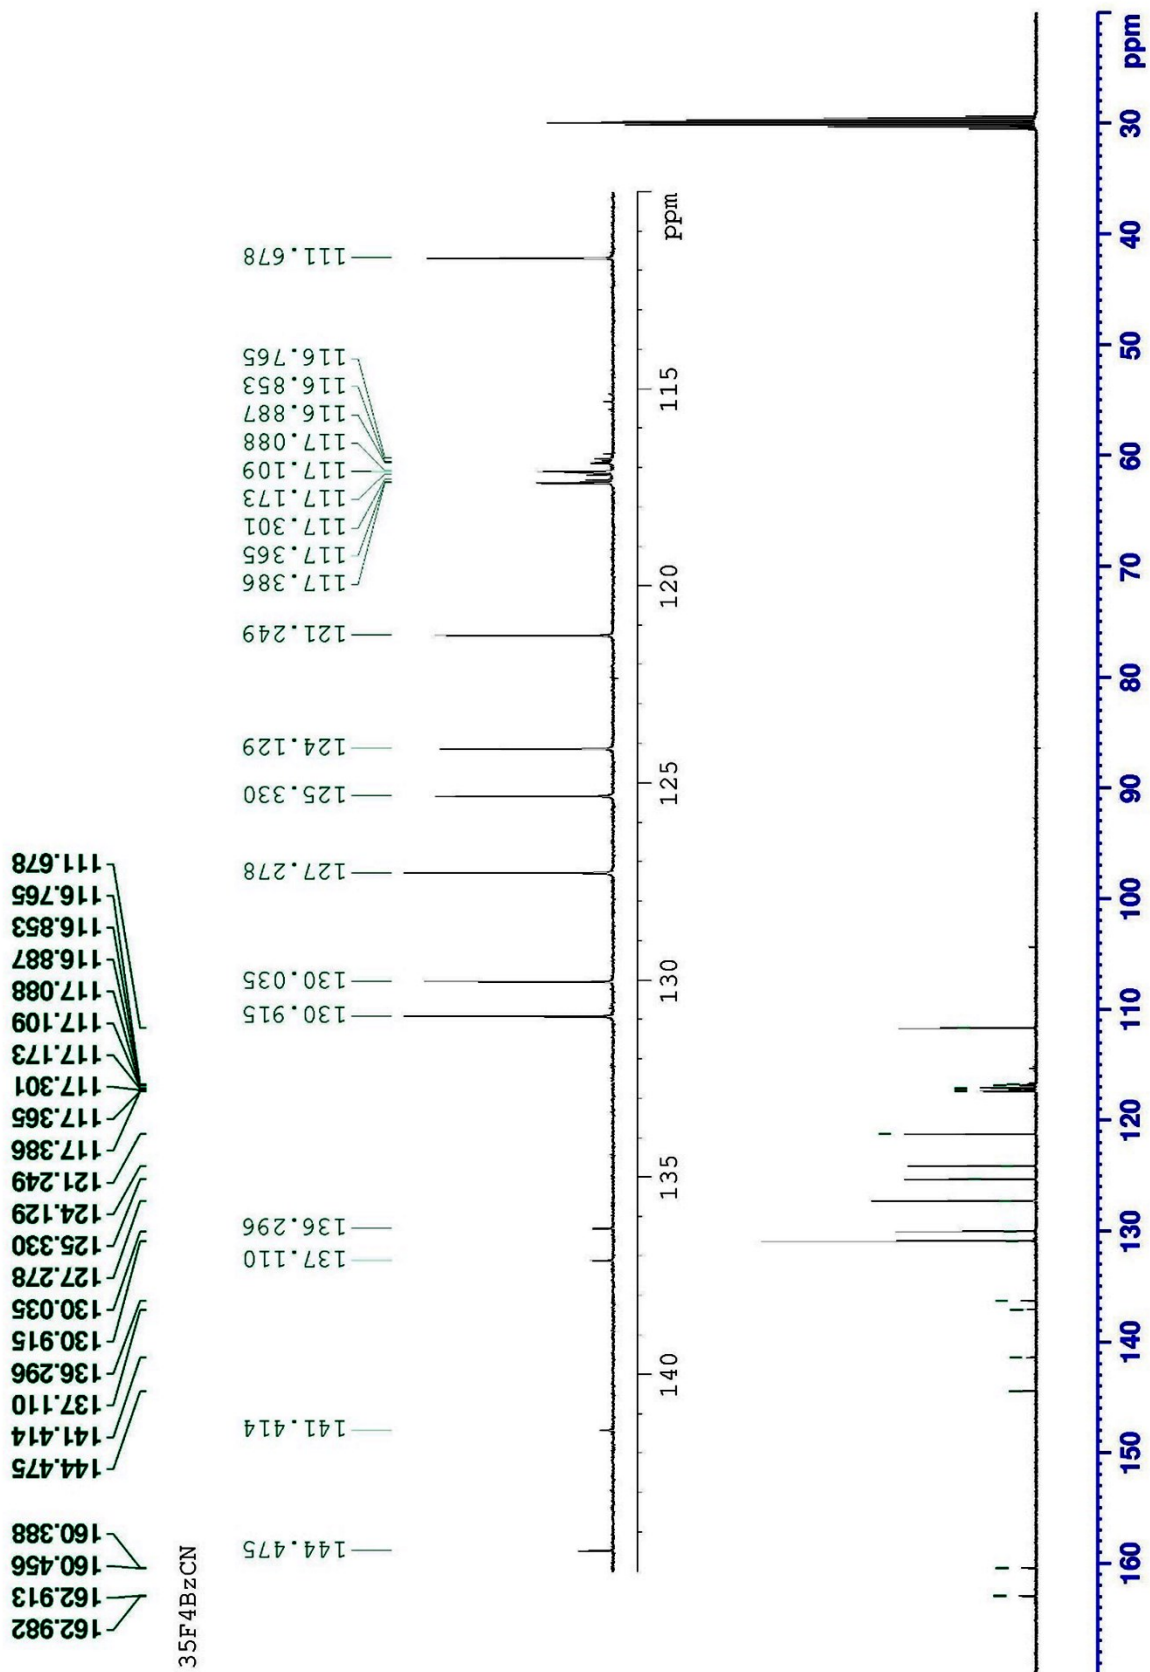

Fig. S2  $^{13}\text{C}$  spectrum of **35F4BzCN** in  $d_6$ -acetone

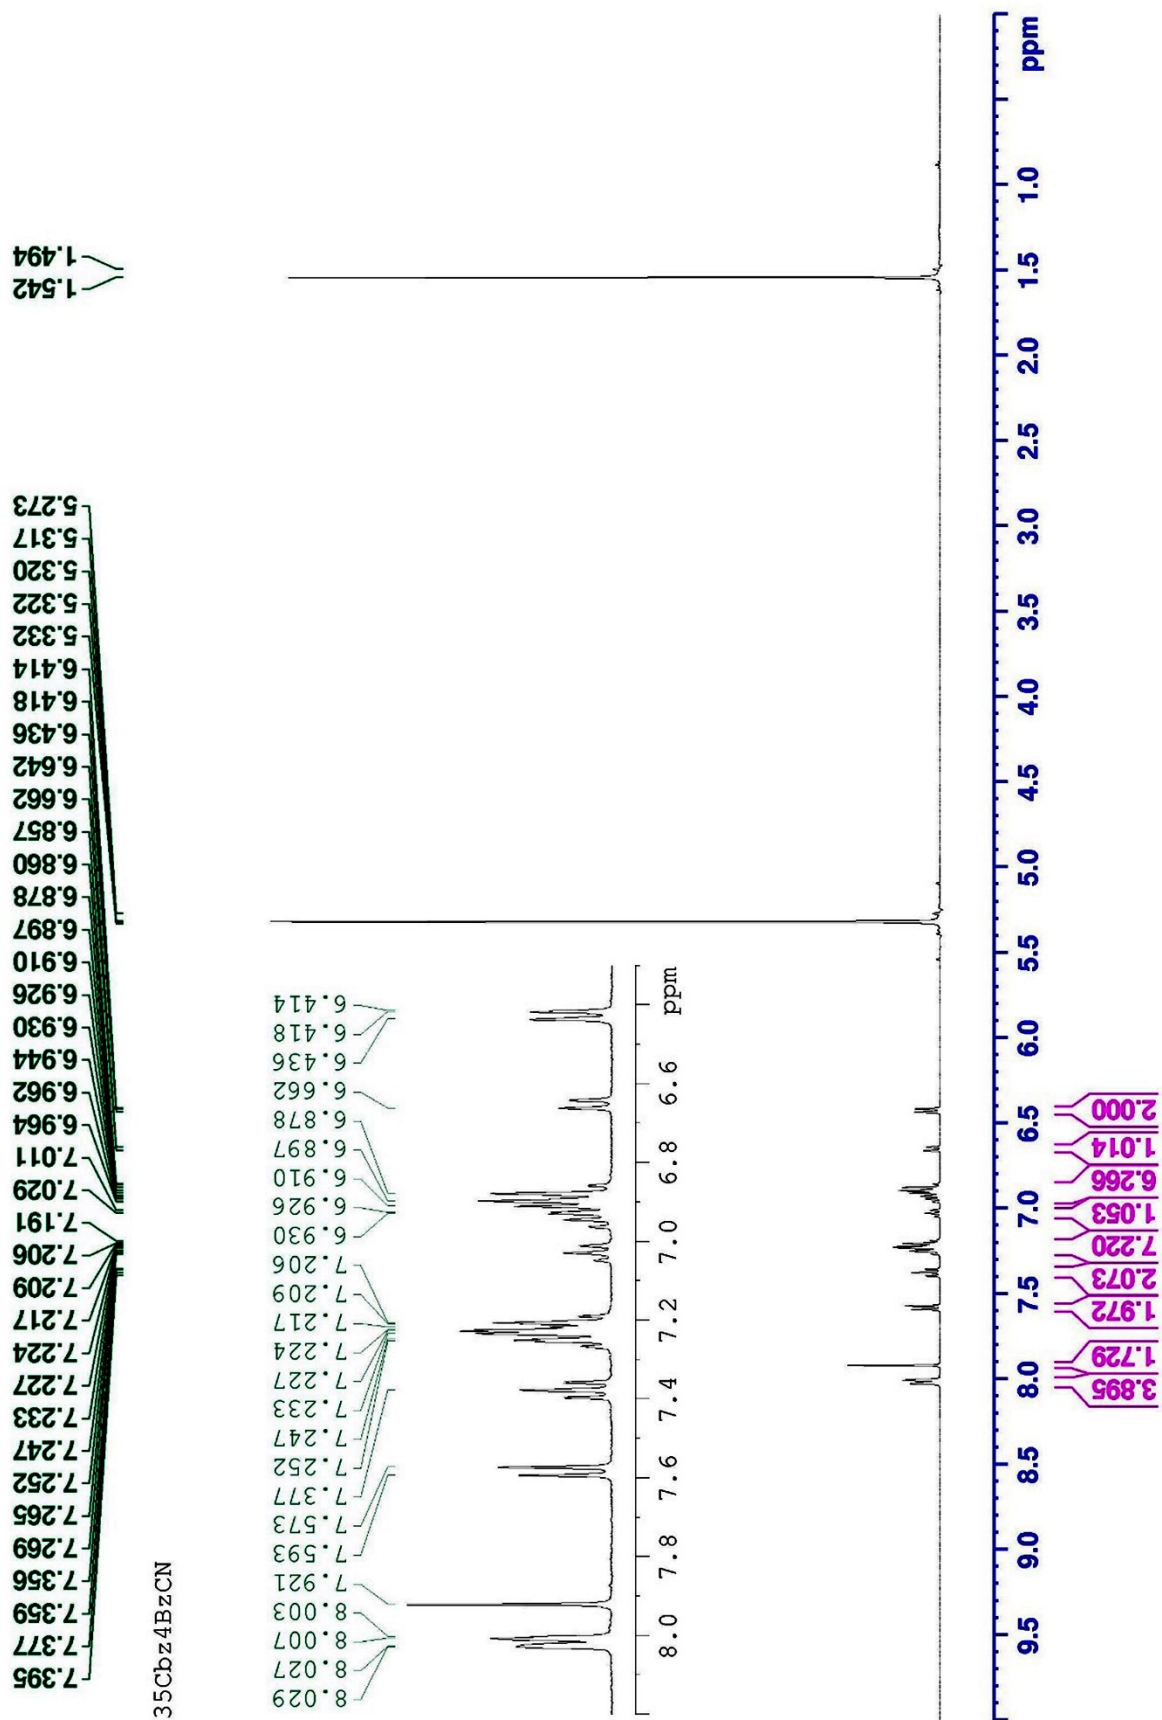

Fig. S3  $^1\text{H}$  spectrum of **35Cbz4BzCN** in  $\text{CD}_2\text{Cl}_2$



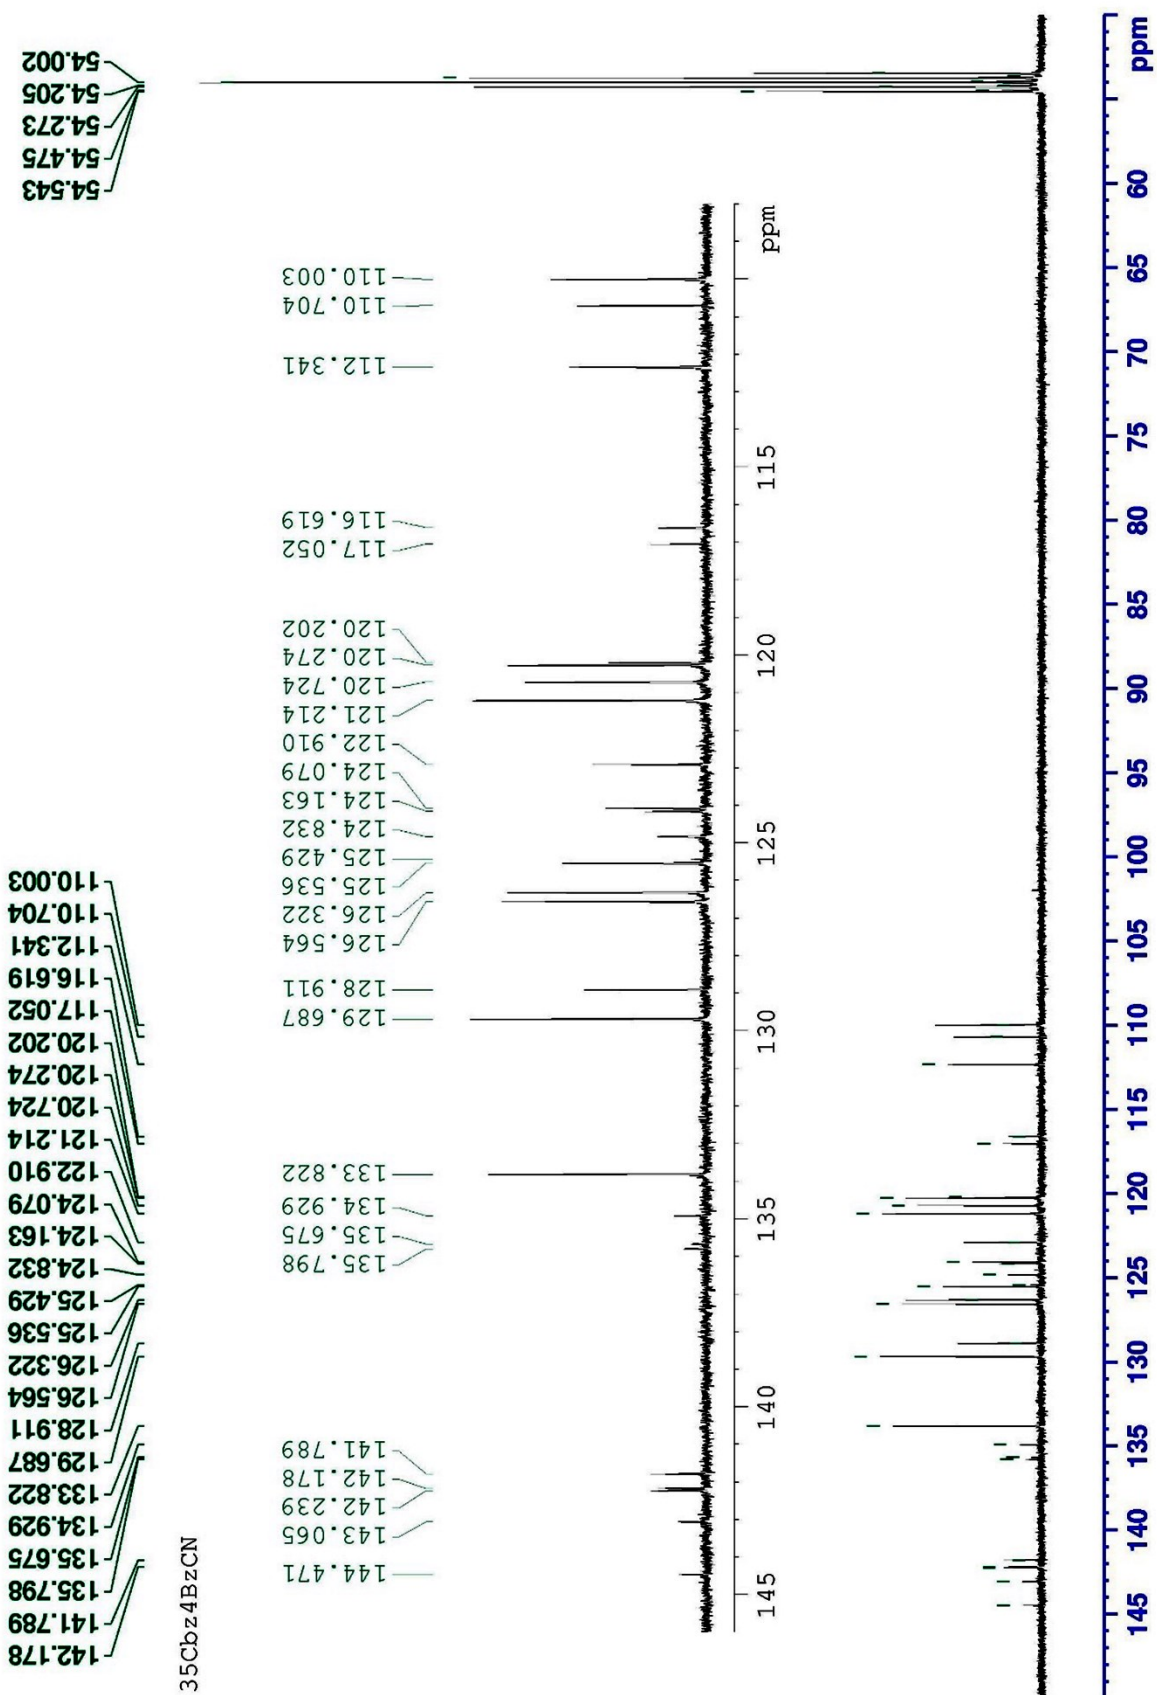

Fig. S4  $^{13}\text{C}$  spectrum of **35Cbz4BzCN** in  $\text{CD}_2\text{Cl}_2$



The DSC scanning of **35Cbz4BzCN**:

In the first round of the DSC scan, the sample was heated to the desired temperature at a heating rate of 10.0 °C/min. The temperature was then held at 350°C for 1 minute to ensure that the compound was entirely melted. The sample was then cooled back to 30.0 °C with a cooling rate of 10.0 °C/min. In the second and third repeated rounds, a heating rate of 10°C/min has been adopted.

The TGA scanning of **35Cbz4BzCN**.

The temperature was preheated to 105°C for 5 minutes, with a heating rate of 10.0°C/min, and then heated to 800°C at a heating rate of 10.0 °C/min under nitrogen atmosphere.

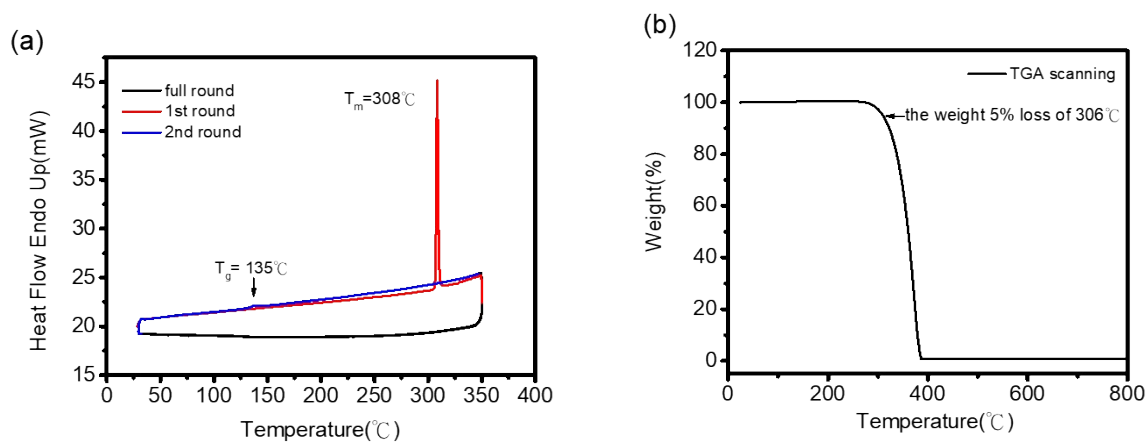

**Fig. S5** (a) DSC measurement of **35Cbz4BzCN** and (b) TGA scanning of **35Cbz4BzCN**.

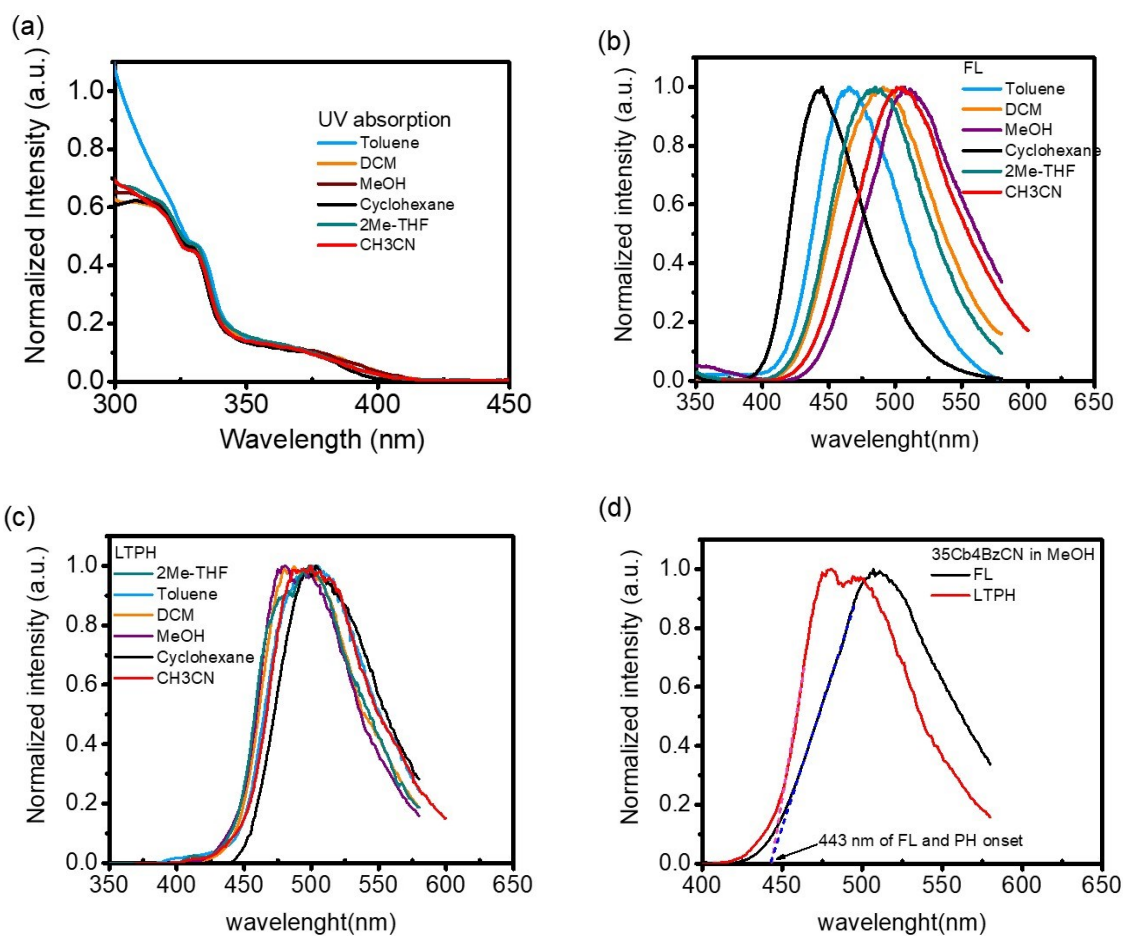

**Fig. S6** Solvatochromic shifts of **35Cbz4BzCN** in various solvents: (a) UV absorption; (b) fluorescence spectra; (c) phosphorescence spectra; (d) Comparison of the fluorescence and phosphorescence in MeOH.

## Photophysical measurements

Steady-state absorption and emission spectra in both solution and solid were recorded with a Hitachi (U-3310) spectrophotometer and an Edinburgh (FS-920) fluorimeter, respectively. Solid-state emission quantum yields were determined by the Jobin-Yvon FL3-21 Horibafluorolog fluorimeter equipped with an integrated sphere. Lifetime studies were performed with an Edinburgh (FL-980) photon-counting system with a 375 nm diode laser excitation source with 40 kHz repetition rate. The time-resolved delayed photoluminescence spectra were acquired for probing the insights of the emissive properties. At zero delay time and a gate width of 100 ns, the prompt emission component can be acquired by an intensified charge-coupled detector equipped with an Nd:YAG 355 nm laser as excitation source, which the emission band is contributed to fluorescence, whereas the component of phosphorescence was acquired at a delay with different gate width. During the experiment, a third harmonic of a Nd:YAG laser (Continuum, Surelite) at 355 nm was used as the pump pulse, which has a duration of 15 ns and a repetition rate of 10 Hz. Under this experimental conditions, collection of the phosphorescence data in the 50  $\mu$ s time scale is allowed.

Besides, Zeiss LSM 710 (Zeiss, Germany) technique equipped with 80 MHz fs mode-locked Ti-Sapphire laser (Mai-Tai DeepSee, Spectra-Physics) for the two-photon excitation microscopy. In order to gather signals, Plan-Apochromat 63x/1.4 oil immersion objective lens (Zeiss, Germany) was employed. To calculate  $k_r$  and  $k_{nr}$ , the following equations are also employed:

$$\tau_{\text{obs}} = \tau_1 * (A_1) + \tau_2 * (A_2)$$

$$k_{\text{obs}} = 1 / \tau_{\text{obs}}$$

$$k_r = \text{QY} * k_{\text{obs}}$$

$$k_{\text{obs}} = k_r + k_{nr}$$

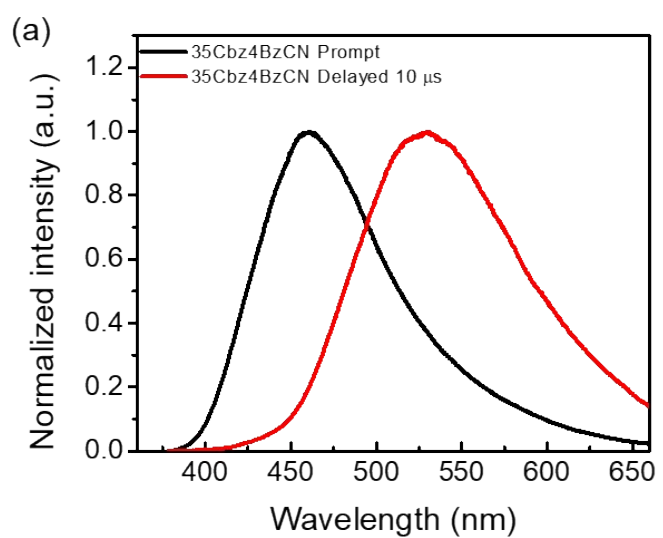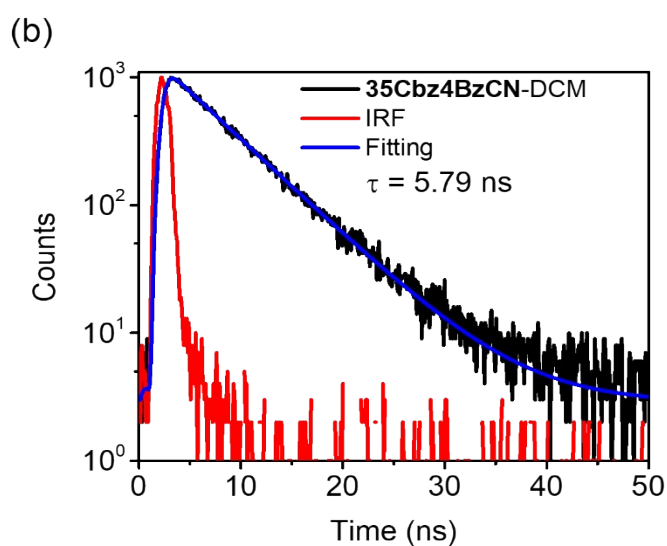

**Fig. S7** (a) The prompt and delayed photoluminescence (PL) spectra of **35Cbz4BzCN** in dichloromethane at 77K. The prompt one is assigned to the fluorescence emission and the delayed one is assigned to the phosphorescence emission. (b) The prompt time resolved PL decay of **35Cbz4BzCN** in dichloromethane at 77K.

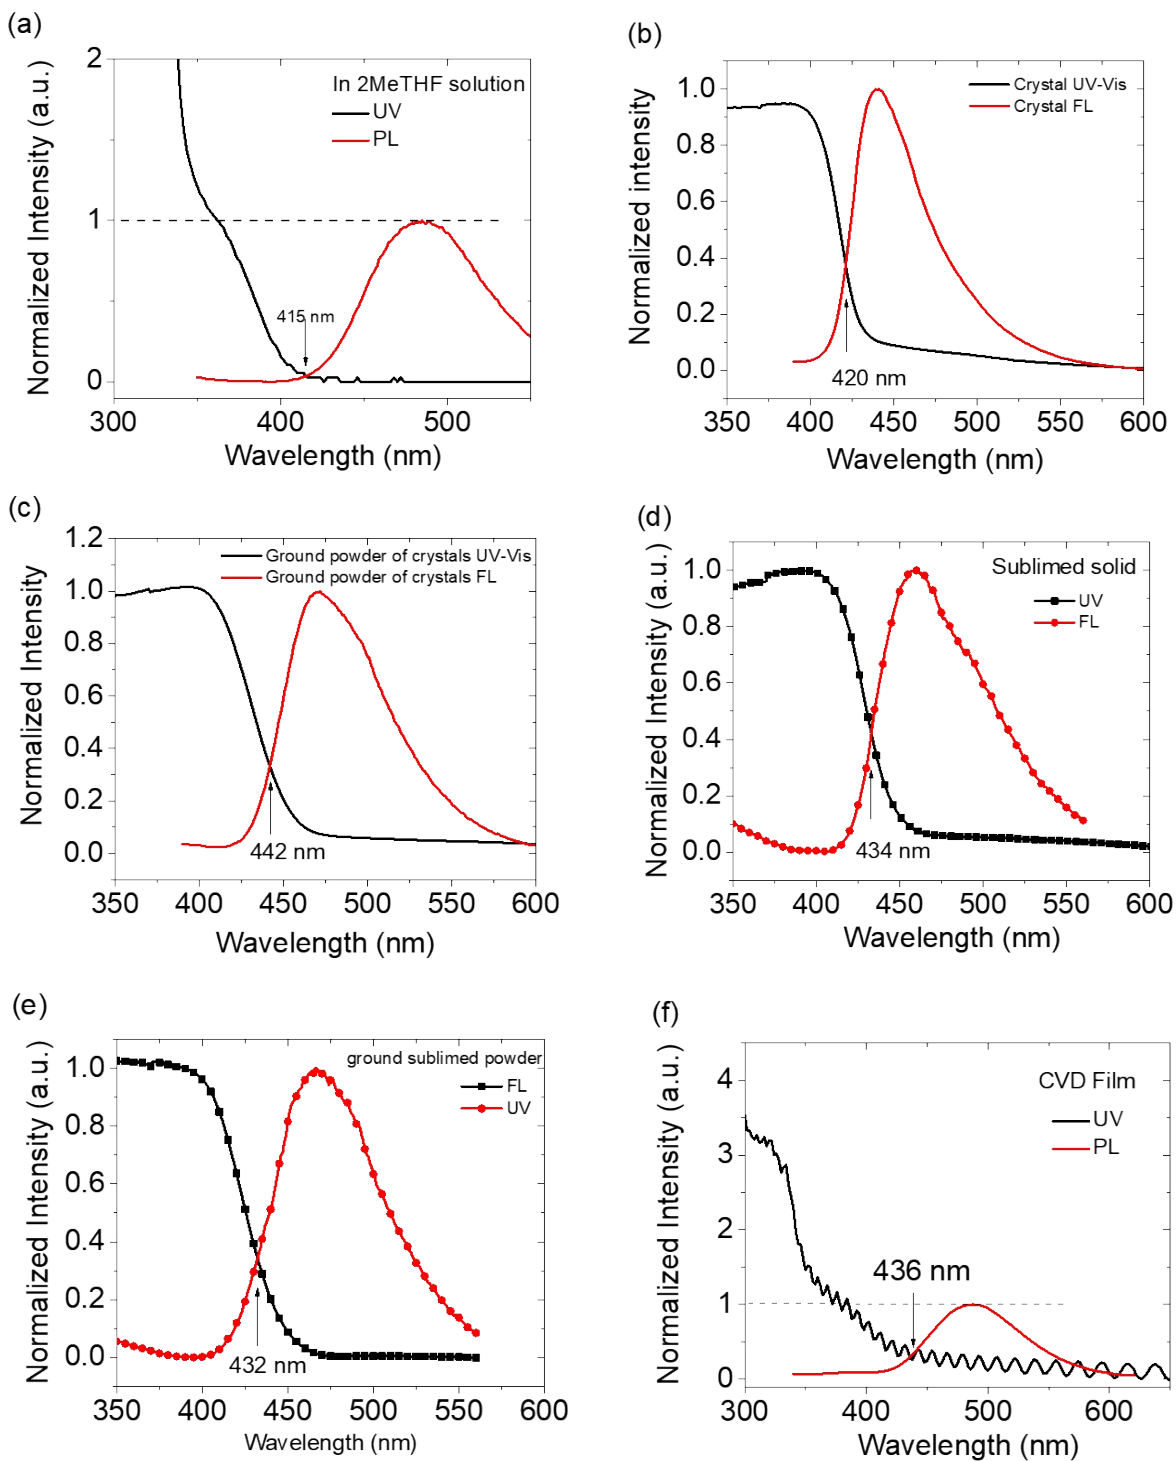

**Fig. S8** The FL onset of **35Cbz4BzCN** in (a) 2MeTHF solution; (b) crystals; (c) ground powder of crystals; (d) sublimed solid; (e) ground powder of sublimed solid; (f) the CVD film.

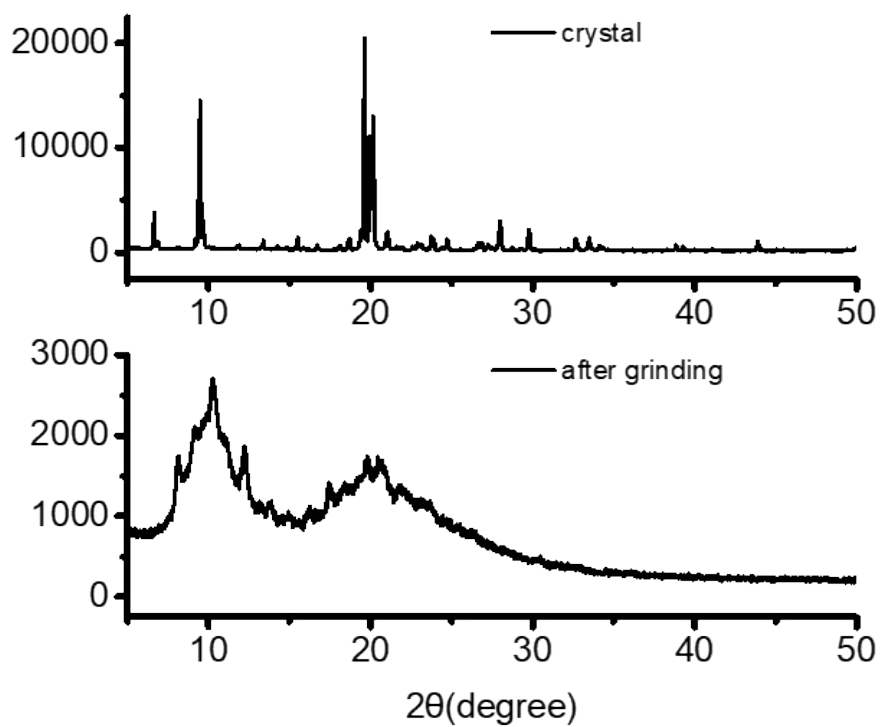

**Fig. S9** (Top) Powder X-ray spectrum of the crystallines of **35Cbz4BzCN** and (bottom) powder X-ray spectrum of the ground powder of **35Cbz4BzCN** crystals. The loss of the fine diffraction pattern can clearly be observed.

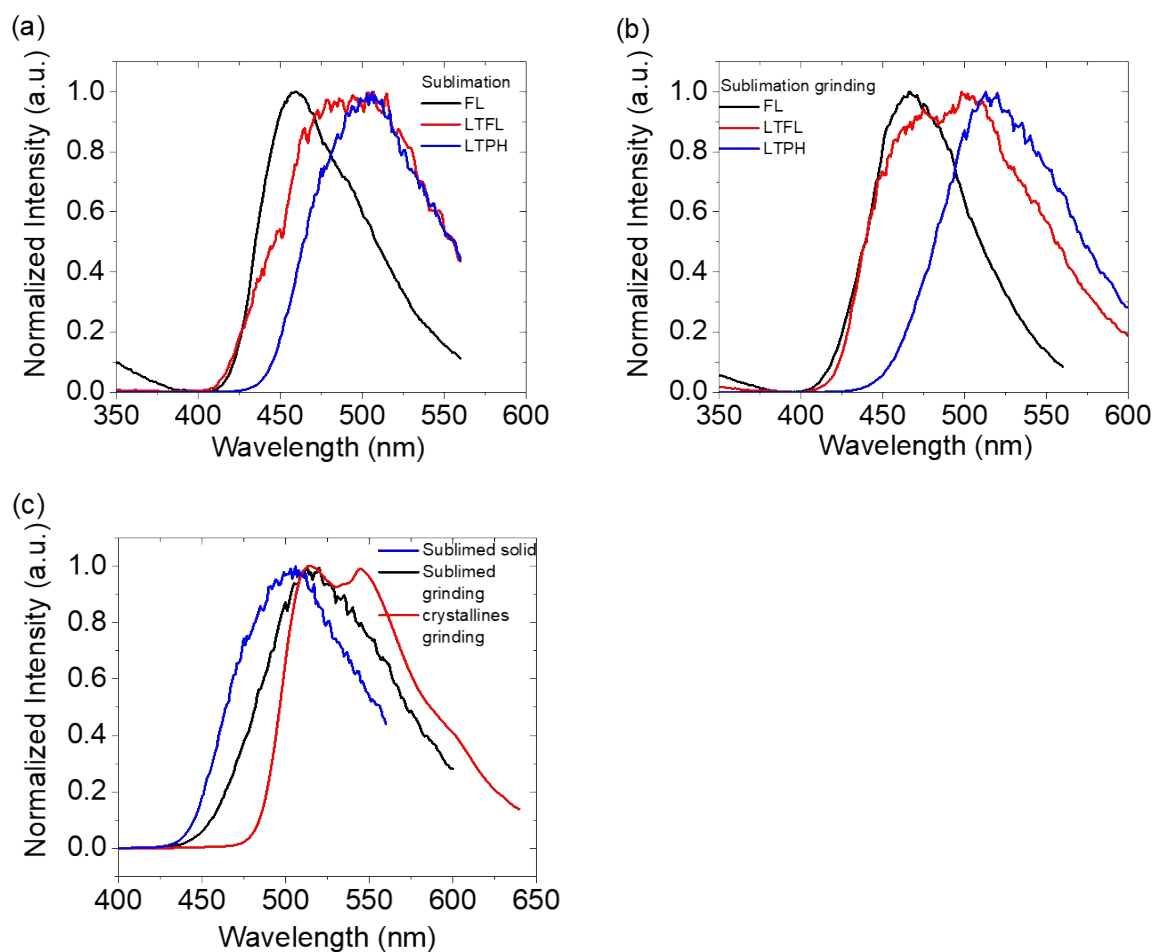

**Fig. S10** The photophysical properties of (a) sublimed solid; (b) sublimed solid being ground to power; and (c) comparison and difference of the phosphorescence between the ground powder of the crystallines and the sublimed solid of **35Cbz4BzCN** at 77 K. The red-shift mechanofluorochromic effect of the ground crystallines of **35Cbz4BzCN** is apparently more significant.



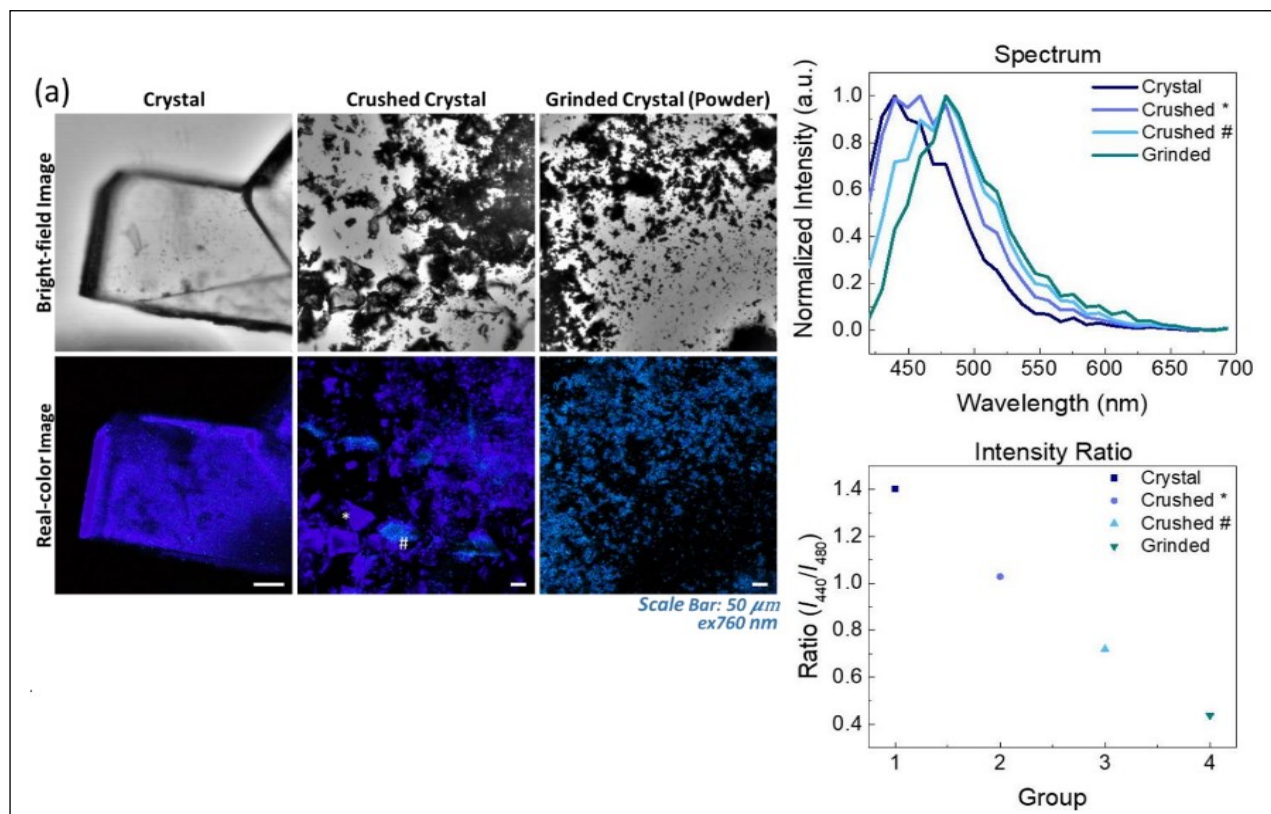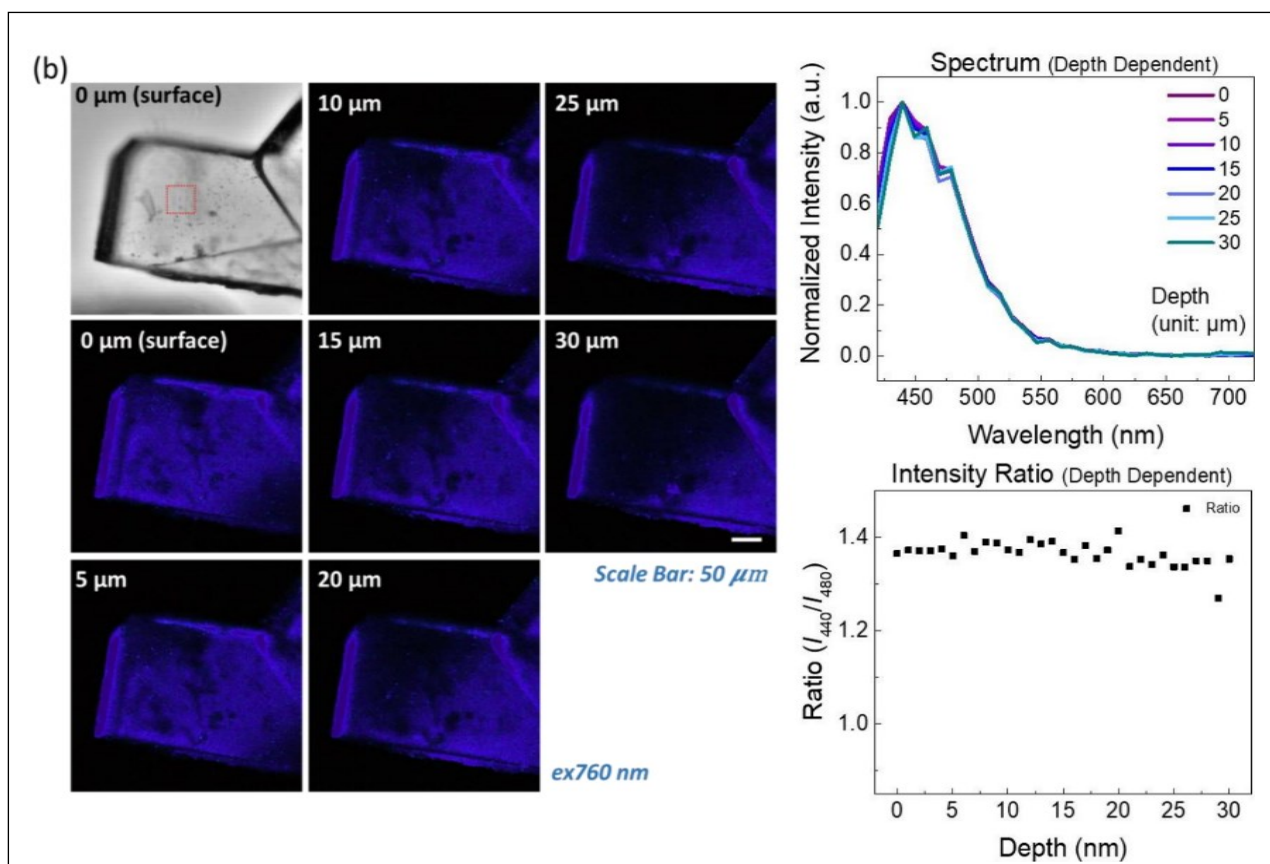

**Fig S11** The two photon excitation measurements of **35Cbz4BzCN**. (a) Comparison of the emission spectra of the crystal, crushed crystal, and ground powder, and (b) measurement of the single crystal with difference excitation depth. The red shifts phenomena can still be seen.

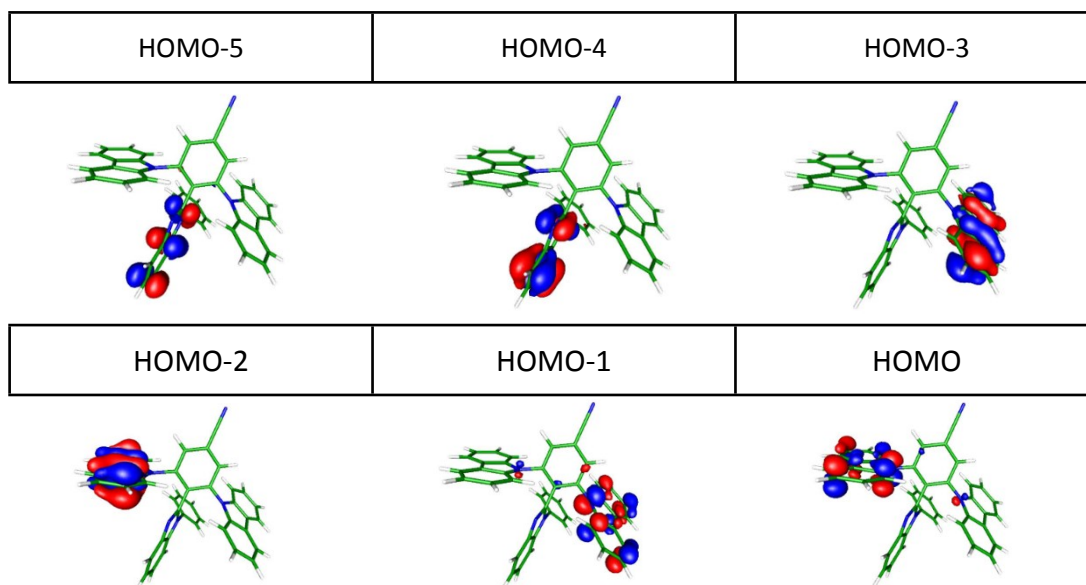

**Fig. S12** The occupied MO levels for **35Cbz4BzCN** and their spatial distributions calculated by DFT.

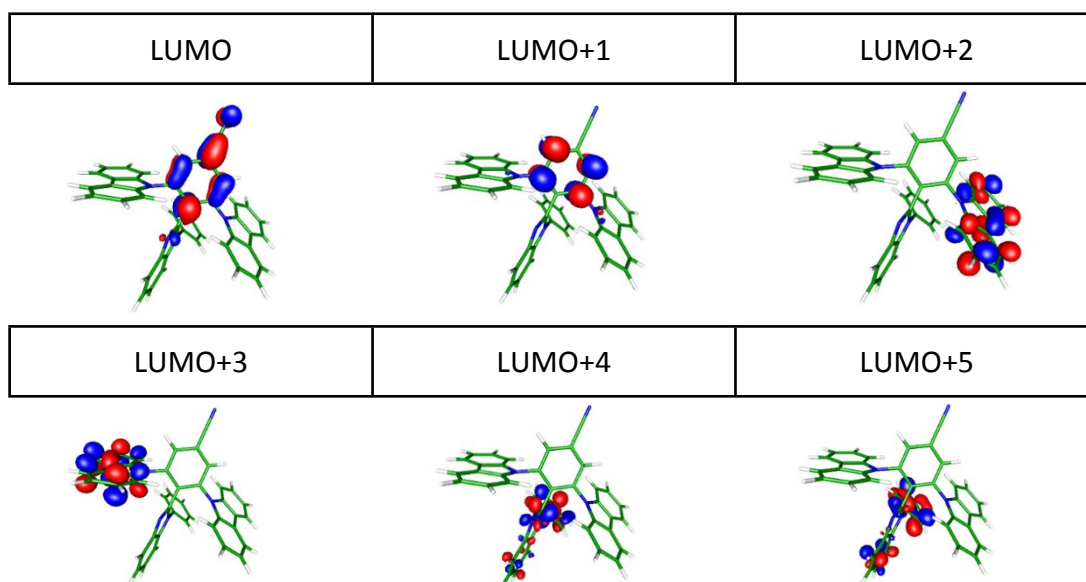

**Fig. S13** The unoccupied MO levels for **35Cbz4BzCN** and their spatial distributions calculated by DFT.

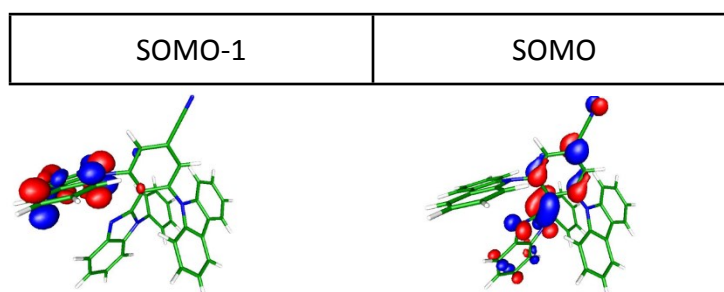

**Fig. S14** The singly occupied MO levels for **35Cbz4BzCN** and their spatial distributions calculated by DFT at TD/DFT/B3LYP/6-311+g\*\* levels.

**Table S1** Calculated absorption wavelength ( $\lambda_{\text{cal}}$ ), oscillator strength ( $f$ ) and transition character of **35Cbz4BzCN** calculated by TD/DFT/B3LYP/6-311+g\*\*.

| $\lambda_{\text{cal}}$ (nm) | $f$    | Transition character (%) | assignment    |
|-----------------------------|--------|--------------------------|---------------|
| 431.8                       | 0.0095 | 0.994078                 | HOMO→LUMO     |
| 411.7                       | 0.0305 | 0.993345                 | HOMO-1→LUMO   |
| 384.89                      | 0.0042 | 0.997041                 | HOMO-2→LUMO   |
| 373.48                      | 0.0018 | 0.996844                 | HOMO-3→LUMO   |
| 354.14                      | 0.0064 | 0.13007                  | HOMO-4→LUMO   |
|                             |        | 0.840249                 | HOMO→LUMO+1   |
| 343.96                      | 0.0751 | 0.710337                 | HOMO-5→LUMO   |
|                             |        | 0.261726                 | HOMO-1→LUMO+1 |

## Determination of the HOMO and LUMO of 35Cbz4BzCN by AC2 and Electrochemistry

The electrochemical properties of the **35Cbz4BzCN** were characterized by cyclic voltammetry (CV) and differential pulse voltammetry (DPV). Ag/AgCl was employed as a reference electrode, the Pt wire was employed as a counter electrode, and tetrabutylammonium perchlorate (0.1 M) was employed as a supporting electrolyte. The oxidation potentials were measured using a Pt working electrode in anhydrous  $\text{CH}_2\text{Cl}_2$  ( $10^{-3}$  M), and the reduction potentials were measured with a glassy carbon working electrode in anhydrous DMF ( $10^{-3}$  M). The HOMO and LUMO values were determined according to the DPV peaks with respect to ferrocene (Fc). We compare the HOMO and LUMO energy level of **35Cbz4BzCN** and ***o*-DiCbzBz**. The cyano group effects on decreasing of the LUMO level can be clearly seen while the effects on the HOMO level is small.

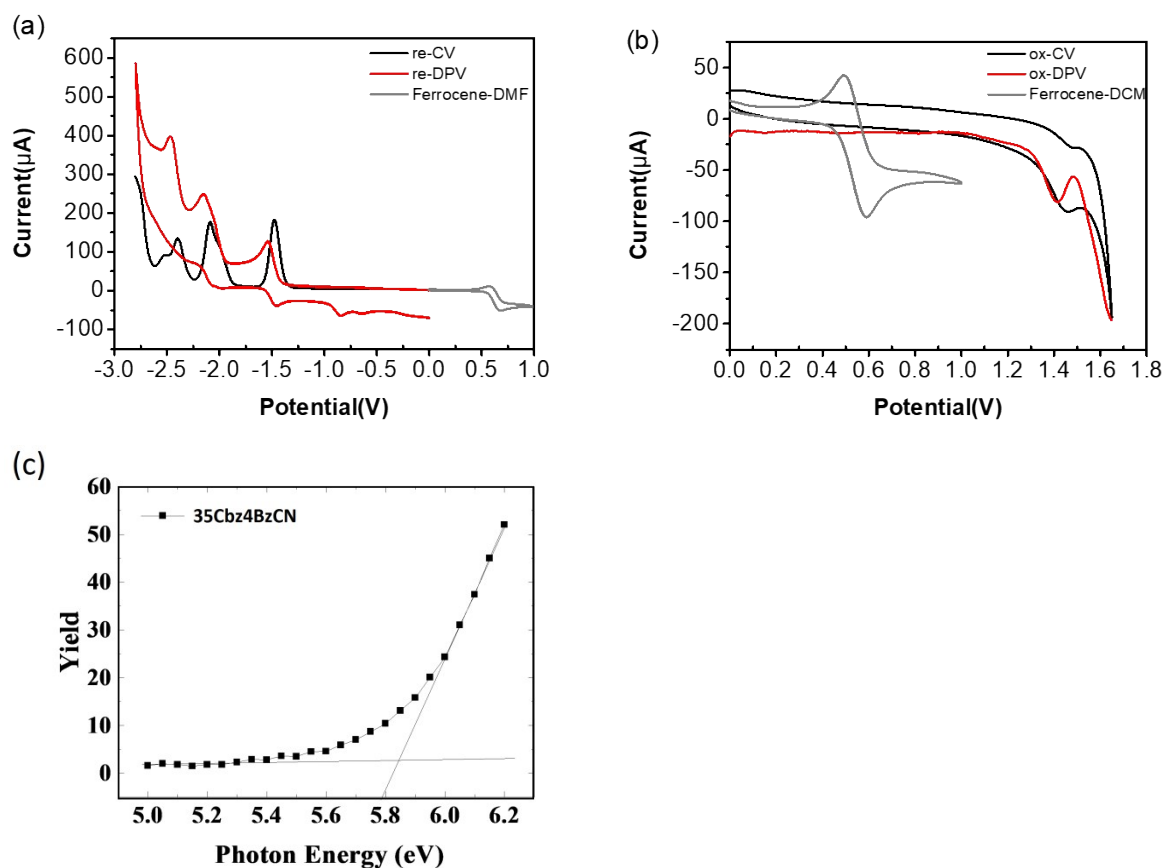

**Fig. S15** CV and DPV for (a) reduction and (b) oxidation scans of **35Cbz4BzCN** and (c) AC-2 measurement.

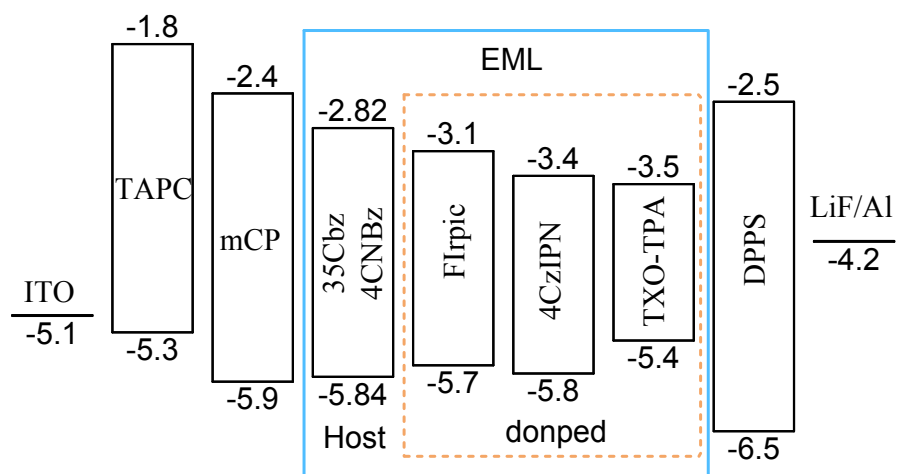

**Fig. S16** HOMO and LUMO alignment of **35Cbz4BzCN** with blue, green and orange red emitters in the electroluminescence device.

### 35Cbz4BzCN Universal host in light emitting devices

#### (a) 4CzIPN as the green TADF emitter:

##### Dopant concentration effects.

The device structure is ITO/TAPC (50 nm)/mCP (10 nm)/ light emitting layer EML (V wt %) (30 nm)/DPPS (55 nm)/LiF (0.8 nm)/Al (120 nm). According this device structure, the V wt % are 1, 5 and 10 of 4CzIPN doping ratio.

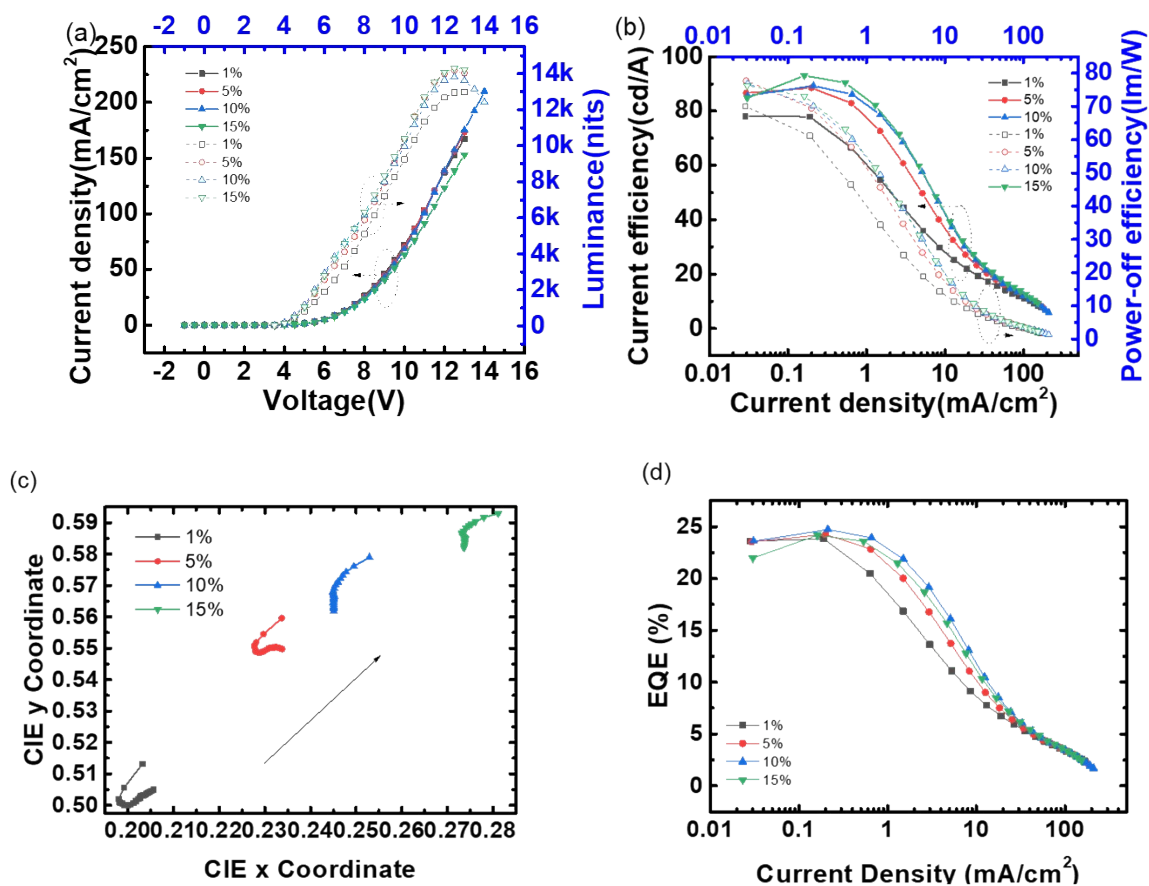

**Fig. S17** Device performance of the green TADF OLED with different 4CzIPN doping ratio: (a) the J-L-V plots; (b) the current density-current efficiency-power efficiency curve; (c) CIE coordinate; (d) the current density- EQE curve

**Table S2** Performance of **35Cbz4BzCN** OLED with different 4CzIPN doping ratio.

| Device entry | Driving voltage (V) <sup>a</sup> | Max luminance (nits) | CE (cd/A)                             | PE (lm/W)                             | EQE (%)                               | LT50@ 1000nits (min) |
|--------------|----------------------------------|----------------------|---------------------------------------|---------------------------------------|---------------------------------------|----------------------|
| 1%           | 4.71                             | 12980                | 78.1 <sup>b</sup> , 51.0 <sup>d</sup> | 70.1 <sup>c</sup> , 31.1 <sup>d</sup> | 23.6 <sup>b</sup> , 15.7 <sup>d</sup> | 16 <sup>d</sup>      |
| 5%           | 4.71                             | 14190                | 88.5 <sup>b</sup> , 74.1 <sup>d</sup> | 77.8 <sup>c</sup> , 47.6 <sup>d</sup> | 24.3 <sup>b</sup> , 17.3 <sup>d</sup> | 10 <sup>d</sup>      |
| 10%          | 4.70                             | 13630                | 89.3 <sup>b</sup> , 80.8 <sup>d</sup> | 76.9 <sup>c</sup> , 52.6 <sup>d</sup> | 24.7 <sup>b</sup> , 22.3 <sup>d</sup> | 13 <sup>d</sup>      |
| 15%          | 4.81                             | 14310                | 93.0 <sup>b</sup> , 90.7 <sup>d</sup> | 76.2 <sup>c</sup> , 53.0 <sup>d</sup> | 24.2 <sup>b</sup> , 21.7 <sup>d</sup> | 12 <sup>d</sup>      |

<sup>a</sup>: J=1mA/cm<sup>2</sup>. <sup>b</sup>: At max current efficiency. <sup>c</sup>: At max power off efficiency. <sup>d</sup>: At 1000nits.



### Device ETL thickness scan

The device structure is ITO/TAPC (50 nm)/mCP (10 nm)/EML (10 wt %) (30 nm)/DPPS (Y nm)/LiF (0.8 nm)/Al (120 nm). The Y are 55 nm, 60 nm, 65 nm, 70 nm and 75 nm of ETL thickness.

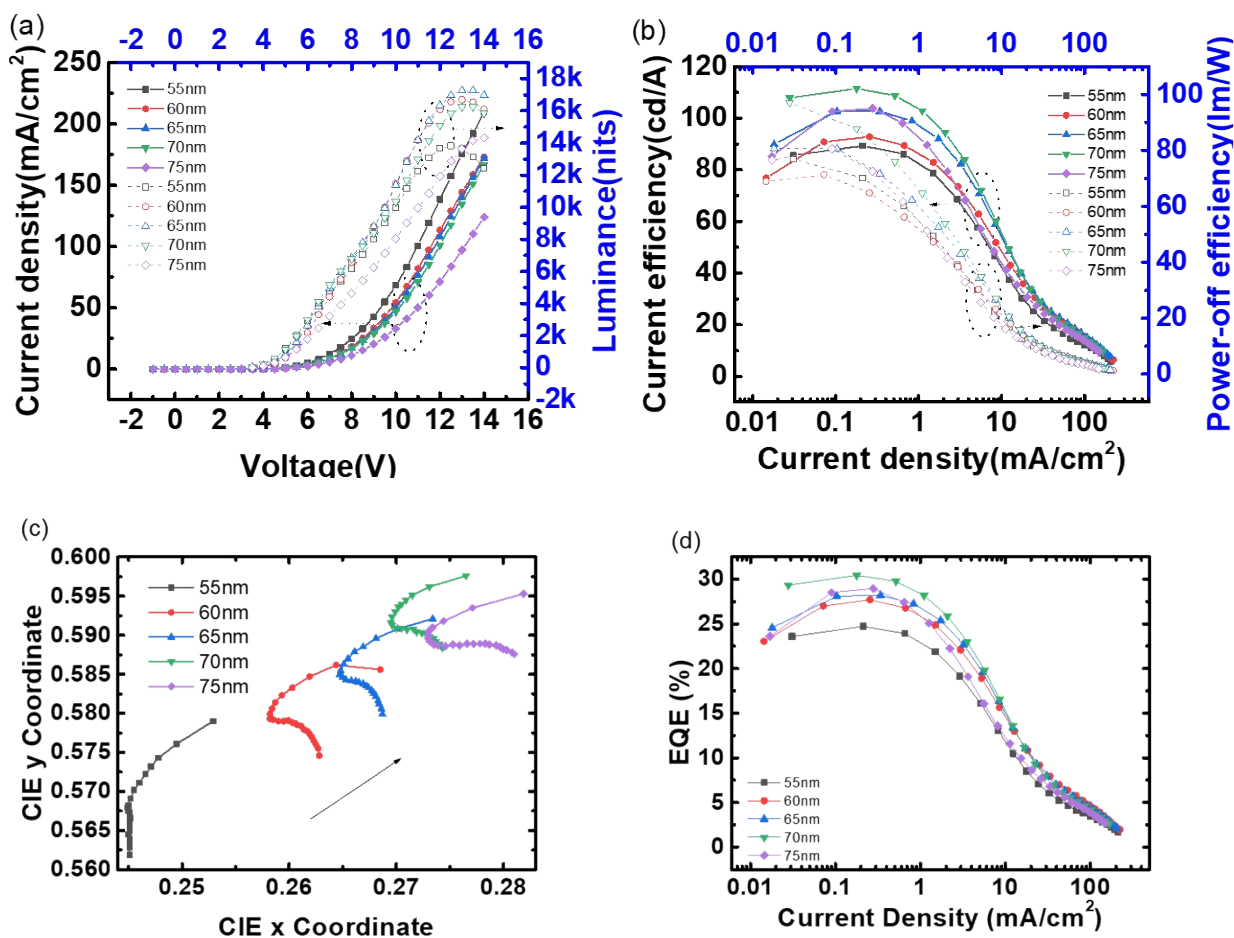

**Fig. S18** Device of the green TADF OLED with different ETL thickness: (a) the J-L-V plots; (b) the current density-current efficiency-power efficiency curve; (c) CIE coordinate; (d) the current density- EQE curve.

**Table S3** Performance of **35Cbz4BzCN** OLED with different ETL thickness.

| Device entry | Driving voltage (V) <sup>a</sup> | Max luminance (nits) | CE (cd/A)                               | PE (lm/W)                             | EQE (%)                               | LT50@1000nits (min) |
|--------------|----------------------------------|----------------------|-----------------------------------------|---------------------------------------|---------------------------------------|---------------------|
| 55nm         | 4.70                             | 13630                | 89.3 <sup>b</sup> , 80.8 <sup>d</sup>   | 76.9 <sup>c</sup> , 52.6 <sup>d</sup> | 24.7 <sup>b</sup> , 22.3 <sup>d</sup> | 13 <sup>d</sup>     |
| 60nm         | 5.20                             | 16700                | 92.8 <sup>b</sup> , 85.4 <sup>d</sup>   | 71.3 <sup>c</sup> , 50.7 <sup>d</sup> | 27.7 <sup>b</sup> , 25.6 <sup>d</sup> | 25 <sup>d</sup>     |
| 65nm         | 5.09                             | 17270                | 102.6 <sup>b</sup> , 97.3 <sup>d</sup>  | 80.7 <sup>c</sup> , 59.9 <sup>d</sup> | 28.2 <sup>b</sup> , 26.8 <sup>d</sup> | 26 <sup>d</sup>     |
| 70nm         | 4.91                             | 16240                | 111.5 <sup>b</sup> , 104.1 <sup>d</sup> | 97.0 <sup>c</sup> , 67.6 <sup>d</sup> | 30.4 <sup>b</sup> , 27.9 <sup>d</sup> | 20 <sup>d</sup>     |
| 75nm         | 5.29                             | 14340                | 103.8 <sup>b</sup> , 91.8 <sup>d</sup>  | 80.6 <sup>c</sup> , 53.9 <sup>d</sup> | 29.0 <sup>b</sup> , 25.7 <sup>d</sup> | 22 <sup>d</sup>     |

<sup>a</sup>: J=1mA/cm<sup>2</sup>. <sup>b</sup>: At max current efficiency. <sup>c</sup>: At max power off efficiency. <sup>d</sup>: At 1000nits.

### EML thickness scan

The device structure is ITO/TAPC (50 nm)/mCP (10 nm)/EML (10 wt %) (X nm)/DPPS (70 nm)/LiF (0.8 nm)/Al (120 nm). The X are 25 nm, 30 nm and 35 nm of EML thickness.

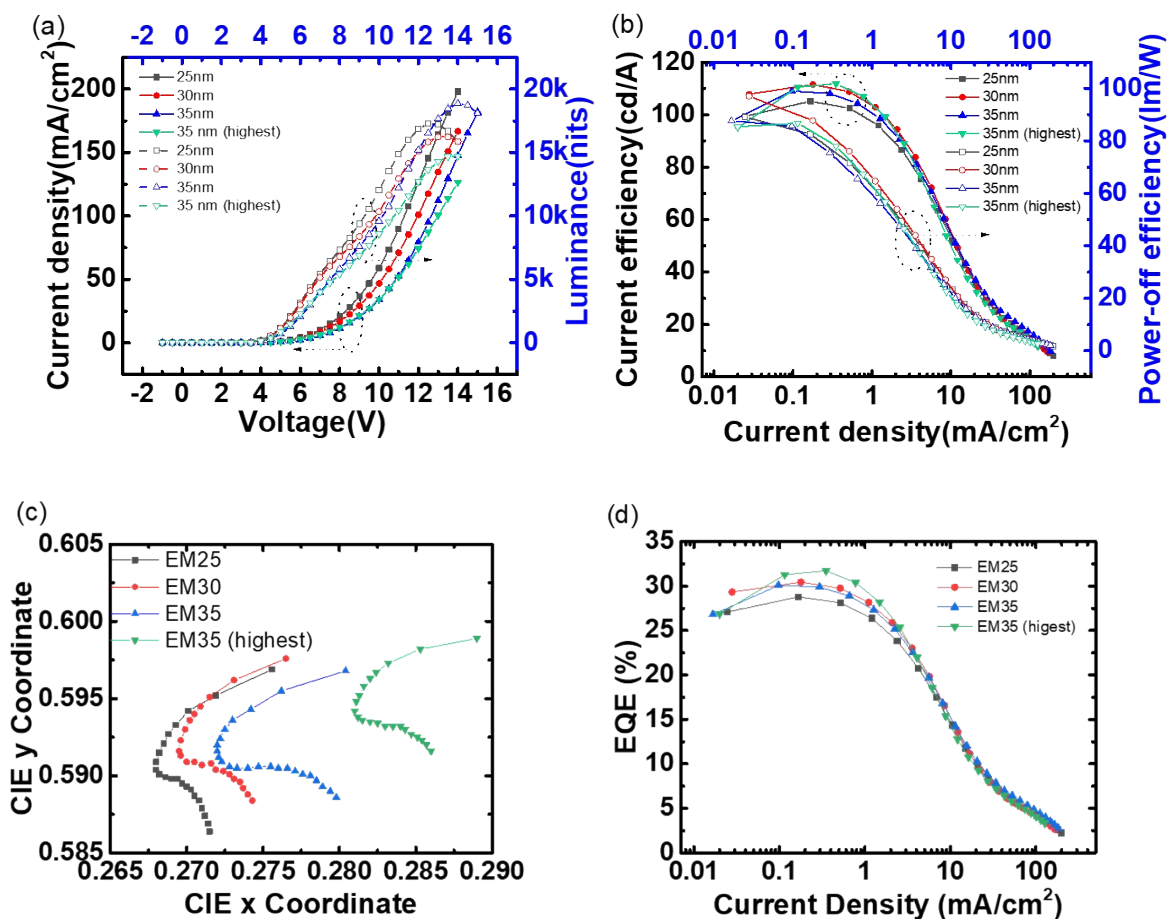

**Fig. S19** Device performance of the green TADF OLED with different EML thickness: (a) the J-L-V plots; (b) the current density-current efficiency-power efficiency curve; (c) CIE coordinate; (d) the current density- EQE curve.

**Table S4** Performance of **35Cbz4BzCN** OLED with different EML thickness

| Device entry      | Driving voltage (V) <sup>a</sup> | Max luminance (nits) | CE (cd/A)                               | PE (lm/W)                             | EQE (%)                               | LT50@1000nits (min) |
|-------------------|----------------------------------|----------------------|-----------------------------------------|---------------------------------------|---------------------------------------|---------------------|
| EML25nm           | 4.85                             | 17270                | 105.1 <sup>b</sup> , 97.4 <sup>d</sup>  | 89.1 <sup>c</sup> , 63.2 <sup>d</sup> | 28.8 <sup>b</sup> , 26.2 <sup>d</sup> | 23 <sup>d</sup>     |
| EML30nm           | 4.90                             | 16240                | 111.5 <sup>b</sup> , 104.1 <sup>d</sup> | 97.0 <sup>c</sup> , 67.4 <sup>d</sup> | 30.4 <sup>b</sup> , 28.5 <sup>d</sup> | 20 <sup>d</sup>     |
| EML35nm           | 5.28                             | 18860                | 109.0 <sup>b</sup> , 101.2 <sup>d</sup> | 87.6 <sup>c</sup> , 60.2 <sup>d</sup> | 30.1 <sup>b</sup> , 27.9 <sup>d</sup> | 28 <sup>d</sup>     |
| EML35nm (highest) | 5.15                             | 14730                | 111.8 <sup>b</sup> , 105.0 <sup>d</sup> | 86.8 <sup>c</sup> , 64.4 <sup>d</sup> | 31.7 <sup>b</sup> , 29.8 <sup>d</sup> | 17 <sup>d</sup>     |

<sup>a</sup>: J=1mA/cm<sup>2</sup>. <sup>b</sup>: At max current efficiency. <sup>c</sup>: At max power off efficiency. <sup>d</sup>: At 1000nits.

## Transient electroluminescence (TrEL) characteristics of the devices

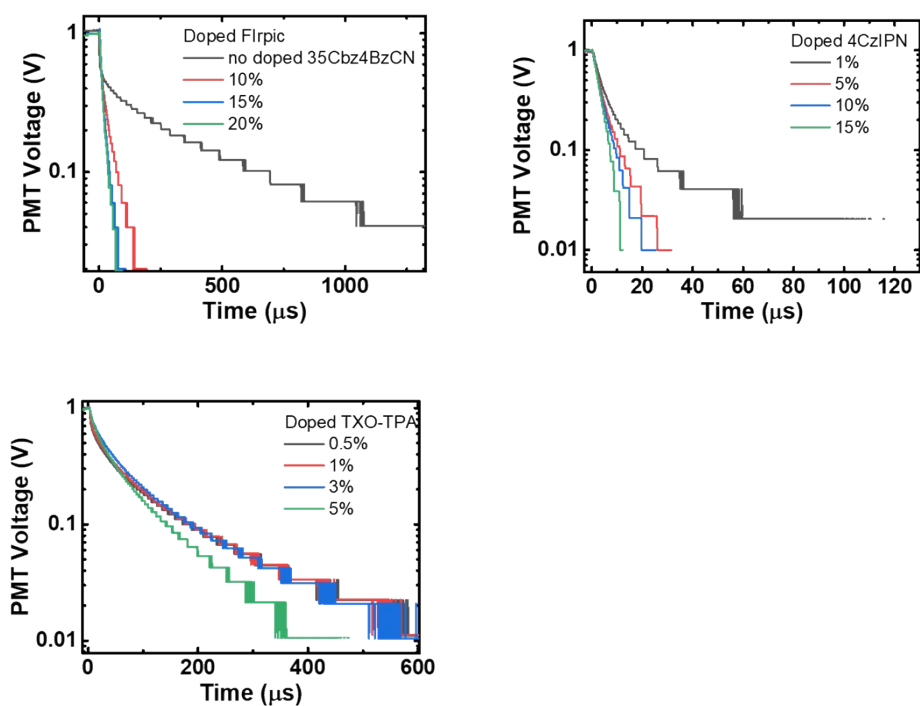

**Fig. S20** Transient electroluminescence (TrEL) of the Flrpic, 4CzIPN and TXO-TPA doped OLED.

**Table S5** The decay half-life time of TrEL

| Device entry         | $A_1$ | $\tau_1$ | $A_2$ | $\tau_2$ |
|----------------------|-------|----------|-------|----------|
| Non-doped 35Cbz4BzCN | 0.35  | 4.54     | 0.65  | 427      |
| Doped Flrpic 10%     | 0.57  | 7.17     | 0.49  | 42.9     |
| Doped Flrpic 15%     | 0.55  | 5.33     | 0.42  | 21.6     |
| Doped Flrpic 20%     | 0.48  | 4.88     | 0.52  | 16.6     |
| Doped 4CzIPN 1%      | 0.70  | 3.02     | 0.30  | 12.2     |
| Doped 4CzIPN 5%      | 1     | 4.36     | -     | -        |
| Doped 4CzIPN 10%     | 1     | 3.88     | -     | -        |
| Doped 4CzIPN 15%     | 1     | 3.15     | -     | -        |
| Doped TXO-TPA 0.5%   | 0.60  | 28.5     | 0.40  | 162      |
| Doped TXO-TPA 1%     | 0.60  | 27.8     | 0.40  | 154      |
| Doped TXO-TPA 3%     | 0.57  | 25.6     | 0.43  | 124      |
| Doped TXO-TPA 5%     | 0.57  | 21.8     | 0.43  | 97.6     |

**(b) 35Czbz4BzCN doped Flrpic as the blue light emitting layer (EML).**

**Blue phosphorescent-Concentration Scan.**

The device structure is ITO/TAPC (50 nm)/mCP (10 nm)/EML (V wt %) (30 nm)/DPPS (55 nm)/LiF (0.8 nm)/Al (120 nm). According to this device structure, the EML V are 0, 10, 15 and 20 of Flrpic doping

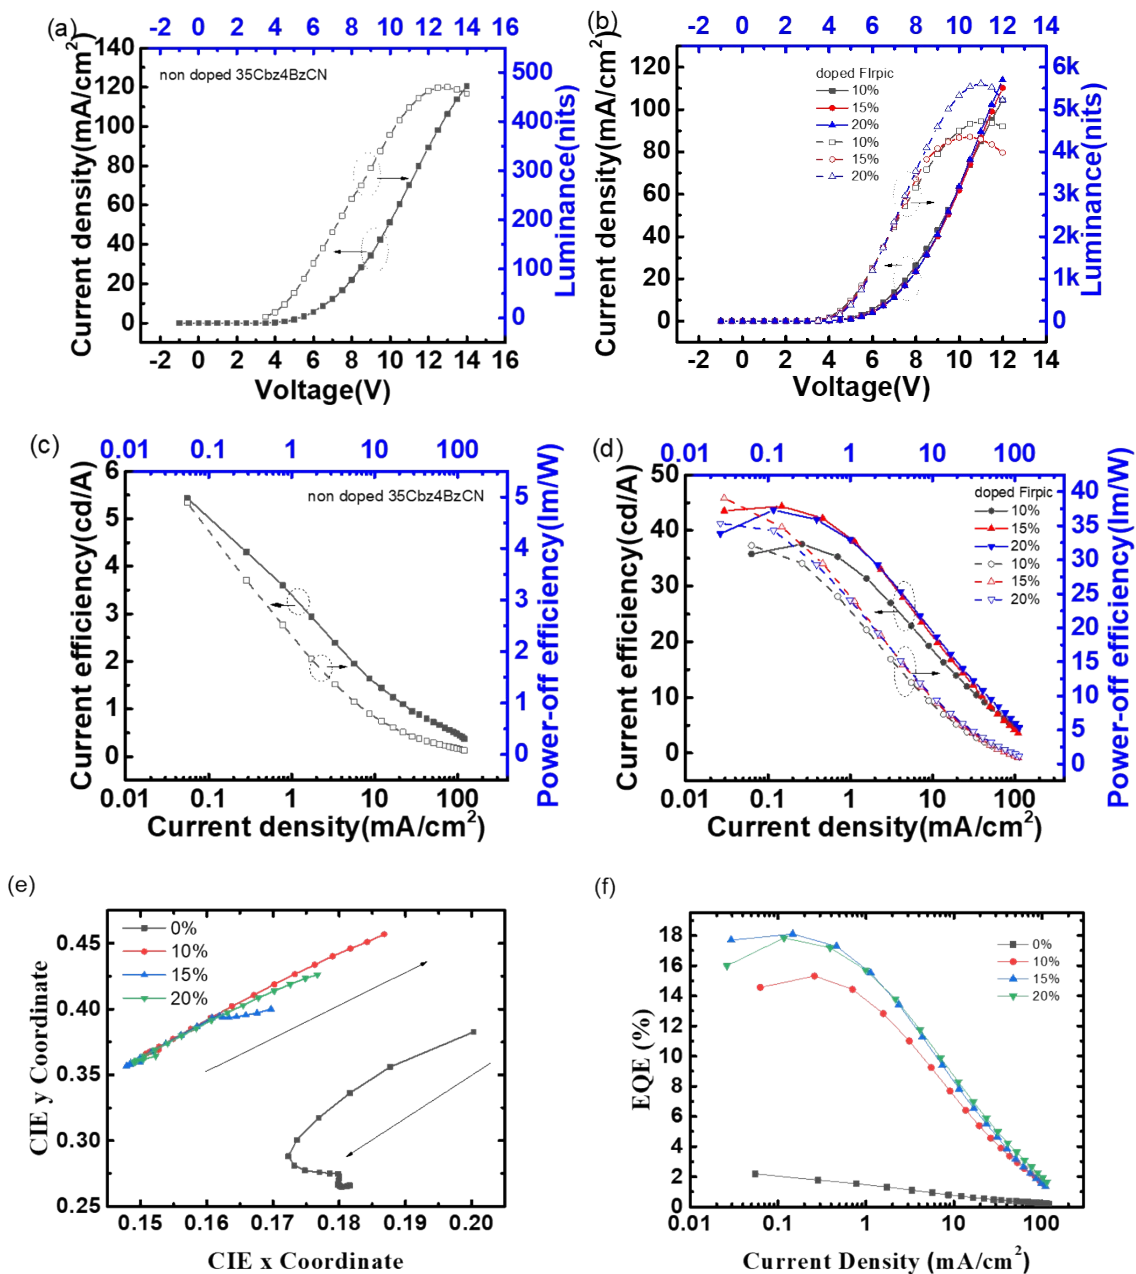

ratio.

**Fig. S21** Device characteristics: The *J-L-V* plots of the blue Flrpic doped **35Czbz4BzCN** OLEDs (a) non doped; (b) with different Flrpic ratio. The current density-current efficiency-power efficiency curve of the OLEDs (c) non-doped; (d) with different Flrpic ratio. (e) CIE coordinate and (f) the current density- EQE curve of the OLEDs with different Flrpic ratio.

**Table S6** Performance of the Flrpic doped OLED with different Flrpic dopant ratio

| Device entry        | Driving voltage (V) <sup>a</sup> | Max luminance (nits) | CE (cd/A)                             | PE (lm/W)                             | EQE (%)                               |
|---------------------|----------------------------------|----------------------|---------------------------------------|---------------------------------------|---------------------------------------|
| Non doped 35Cz4BzCN | 4.61                             | 470                  | 5.4 <sup>b</sup> , 1.2 <sup>d</sup>   | 4.9 <sup>c</sup> , 1.9 <sup>d</sup>   | 2.2 <sup>b</sup> , 1.0 <sup>d</sup>   |
| 10%                 | 4.66                             | 4720                 | 37.5 <sup>b</sup> , 25.1 <sup>e</sup> | 32.1 <sup>c</sup> , 14.0 <sup>e</sup> | 15.3 <sup>b</sup> , 9.1 <sup>e</sup>  |
| 15%                 | 4.90                             | 4360                 | 44.3 <sup>b</sup> , 30.1 <sup>e</sup> | 39.1 <sup>c</sup> , 16.2 <sup>e</sup> | 18.1 <sup>b</sup> , 10.3 <sup>e</sup> |
| 20%                 | 5.00                             | 5620                 | 43.7 <sup>b</sup> , 30.0 <sup>e</sup> | 35.4 <sup>c</sup> , 16.2 <sup>e</sup> | 17.8 <sup>b</sup> , 10.6 <sup>e</sup> |

<sup>a</sup>: J=1mA/cm<sup>2</sup>. <sup>b</sup>: At max current efficiency. <sup>c</sup>: At max power off efficiency. <sup>d</sup>: At 100 nits. <sup>e</sup>: At 1000 nits.



### Blue phosphorescent ETL thickness scan.

The device structure is ITO/TAPC (55 nm)/mCP (10 nm)/EML (20 wt %) (30 nm)/DPDS (Y nm)/LiF (0.8 nm)/Al (120 nm). The Y are 55 nm, 60 nm, 65 nm and 70 nm of ETL thickness.

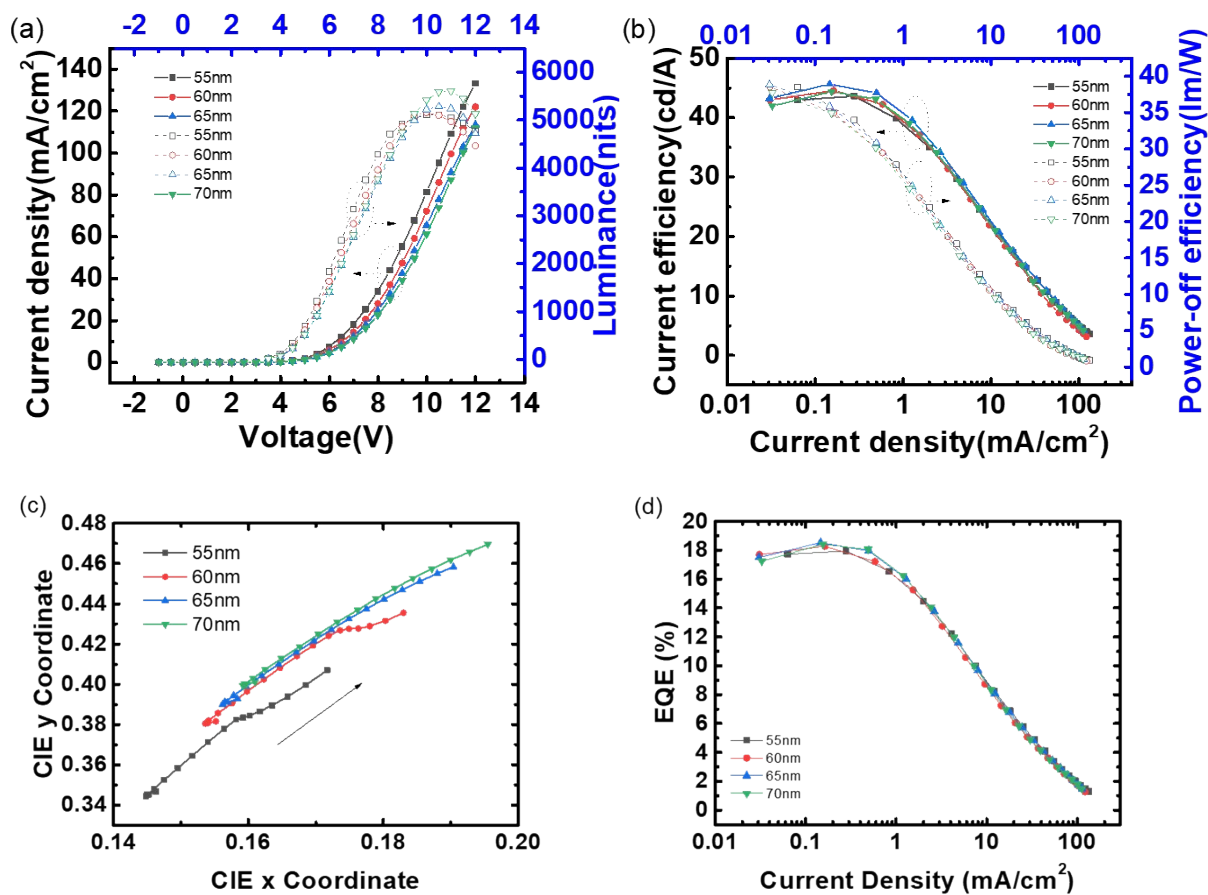

**Fig. S22** ETL thickness effects on the performance of the blue Firpic doped OLEDs: (a) the J-L-V plots; (b) the current density-current efficiency-power efficiency curve; (c) CIE coordinate; (d) the current density- EQE curve.

**Table S7** ETL thickness effects on the performance of the blue Flrpic doped OLEDs

| Device entry | Driving voltage (V) <sup>a</sup> | Max luminance (nits) | CE (cd/A)                             | PE (lm/W)                             | EQE (%)                               | LT50@ 1000nits (min) |
|--------------|----------------------------------|----------------------|---------------------------------------|---------------------------------------|---------------------------------------|----------------------|
| 55nm         | 4.56                             | 5110                 | 43.6 <sup>b</sup> , 31.8 <sup>d</sup> | 38.5 <sup>c</sup> , 19.0 <sup>d</sup> | 18.0 <sup>b</sup> , 13.1 <sup>d</sup> | 32 <sup>d</sup>      |
| 60nm         | 4.71                             | 5160                 | 44.5 <sup>b</sup> , 32.3 <sup>d</sup> | 38.6 <sup>c</sup> , 18.8 <sup>d</sup> | 18.3 <sup>b</sup> , 13.1 <sup>d</sup> | 13 <sup>d</sup>      |
| 65nm         | 4.81                             | 5290                 | 45.6 <sup>b</sup> , 33.2 <sup>d</sup> | 38.9 <sup>c</sup> , 18.7 <sup>d</sup> | 18.5 <sup>b</sup> , 13.3 <sup>d</sup> | 23 <sup>d</sup>      |
| 70nm         | 4.86                             | 5610                 | 44.4 <sup>b</sup> , 33.3 <sup>d</sup> | 37.7 <sup>c</sup> , 18.8 <sup>d</sup> | 18.4 <sup>b</sup> , 13.7 <sup>d</sup> | 18 <sup>d</sup>      |

<sup>a</sup>: J=1mA/cm<sup>2</sup>. <sup>b</sup>: At max current efficiency. <sup>c</sup>: At max power off efficiency. <sup>d</sup>: At 1000nits.

**Blue phosphorescent The HTL thickness scan.**

The device structure is ITO/TAPC (W nm)/mCP (10 nm)/EML (20 wt %) (30 nm)/DPPS (65 nm)/LiF (0.8 nm)/Al (120 nm). The W are 50 nm, 55 nm and 60 nm of HTL thickness.

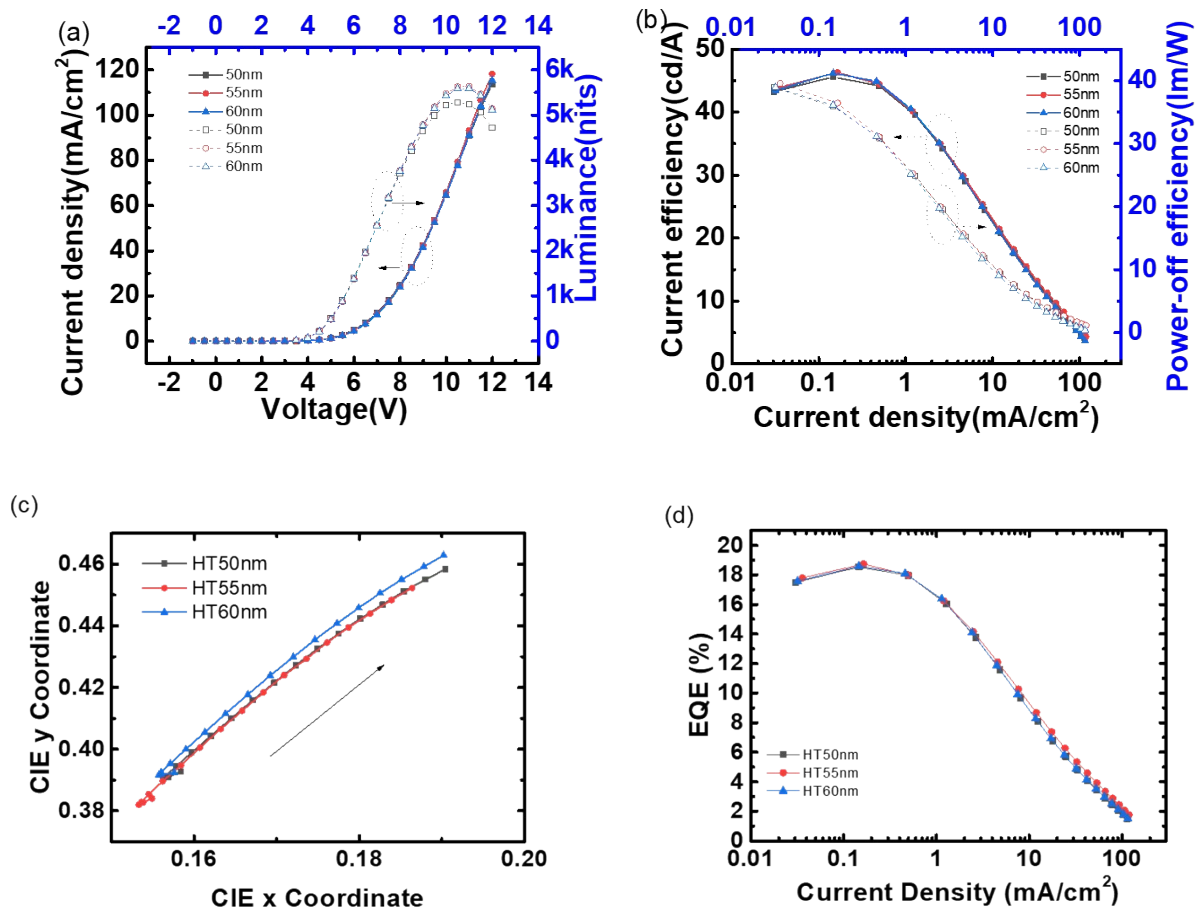

**Fig. S23** HTL thickness effects on the performance of the blue Firpic doped OLEDs: (a) the J-L-V plots; (b) the current density-current efficiency-power efficiency curve; (c) CIE coordinate; (d) the current density- EQE curve.

**Table S8** HTL thickness effects on the performance of the blue Flrpic doped OLEDs

| Device entry | Driving voltage (V) <sup>a</sup> | Max luminance (nits) | CE (cd/A)                             | PE (lm/W)                             | EQE (%)                               | LT50@ 1000nits (min) |
|--------------|----------------------------------|----------------------|---------------------------------------|---------------------------------------|---------------------------------------|----------------------|
| 50nm         | 4.82                             | 5290                 | 45.6 <sup>b</sup> , 33.2 <sup>d</sup> | 38.9 <sup>c</sup> , 18.7 <sup>d</sup> | 18.5 <sup>b</sup> , 13.3 <sup>d</sup> | 23 <sup>d</sup>      |
| 55nm         | 4.85                             | 5640                 | 46.3 <sup>b</sup> , 33.7 <sup>d</sup> | 39.6 <sup>c</sup> , 18.9 <sup>d</sup> | 18.7 <sup>b</sup> , 13.6 <sup>d</sup> | 18 <sup>d</sup>      |
| 60nm         | 4.89                             | 5590                 | 46.2 <sup>b</sup> , 33.7 <sup>d</sup> | 38.9 <sup>c</sup> , 18.5 <sup>d</sup> | 18.6 <sup>b</sup> , 13.5 <sup>d</sup> | 22 <sup>d</sup>      |

<sup>a</sup>: J=1mA/cm<sup>2</sup>. <sup>b</sup>: At max current efficiency. <sup>c</sup>: At max power off efficiency. <sup>d</sup>: At 1000nits.

### Blue phosphorescent two host system device.

The 1 EML device structure is ITO/TAPC (55 nm)/mCP (10 nm)/EML (20 wt %) (30 nm)/DPPS (65 nm)/LiF (0.8 nm)/Al (120 nm), The 2 EML device structure is ITO/TAPC (55 nm)/mCP (10 nm)/EML(I) *o*-diCzBz doped Flrpic (20 wt %) (15 nm)/ EML(II) 35Cz4BzCN doped Flrpic (20 wt %) (15 nm)/DPPS (65 nm)/LiF (0.8 nm)/Al (120 nm).

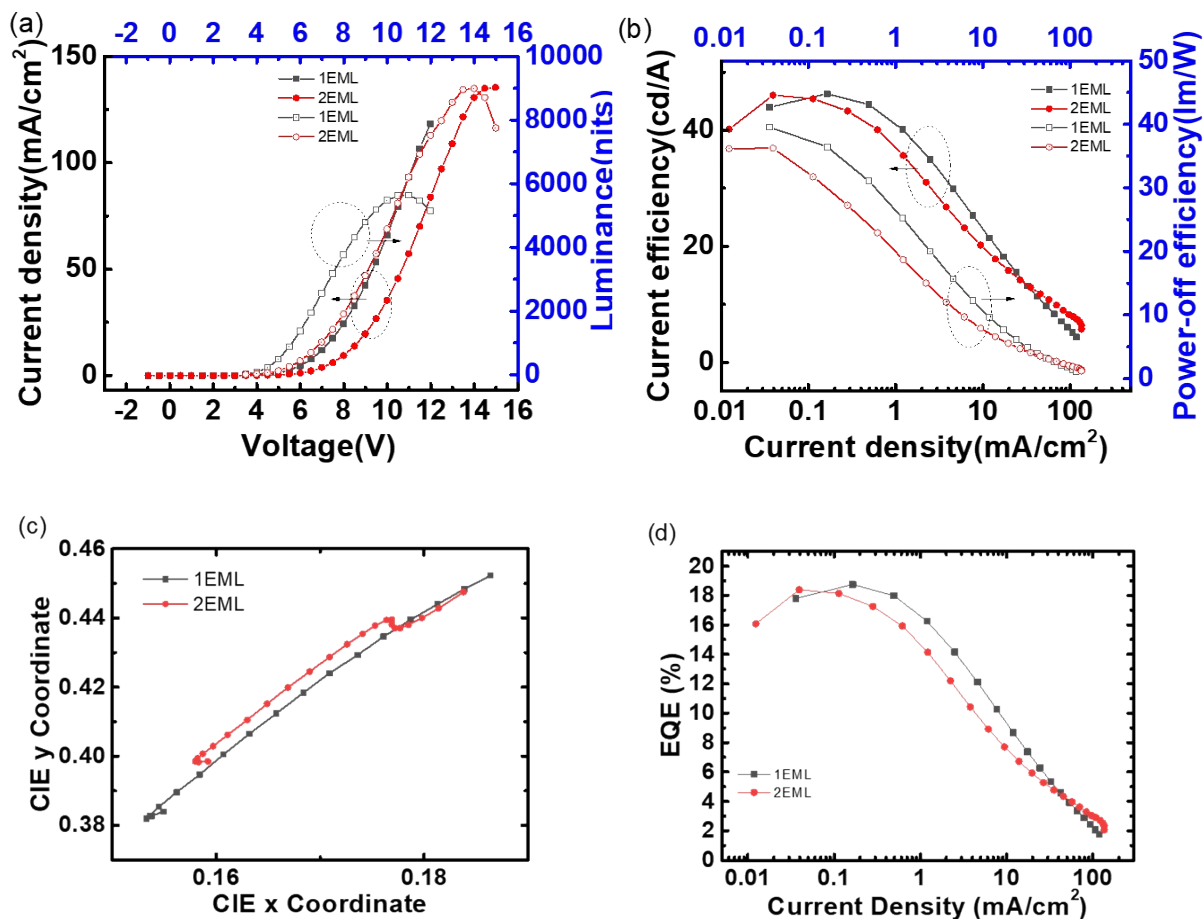

**Fig. S24** Two-emitting-layer-structure effects on the performance of the blue Flrpic doped OLEDs (a) the J-L-V plots; (b) the current density-current efficiency-power efficiency curve; (c) CIE coordinate; (d) the current density- EQE curve.

**Table. S9** Performance of 1EML and 2 EML OLEDs

| Device entry | Driving voltage (V) <sup>a</sup> | Max luminance (nits) | CE (cd/A)                             | PE (lm/W)                             | EQE (%)                               | LT50@ 1000nits (min) |
|--------------|----------------------------------|----------------------|---------------------------------------|---------------------------------------|---------------------------------------|----------------------|
| 1EML         | 4.85                             | 5640                 | 46.3 <sup>b</sup> , 33.7 <sup>d</sup> | 39.6 <sup>c</sup> , 18.9 <sup>d</sup> | 18.7 <sup>b</sup> , 13.6 <sup>d</sup> | 18 <sup>d</sup>      |
| 2EML         | 5.81                             | 8990                 | 46.1 <sup>b</sup> , 27.0 <sup>d</sup> | 36.2 <sup>c</sup> , 12.2 <sup>d</sup> | 18.4 <sup>b</sup> , 10.5 <sup>d</sup> | 11 <sup>d</sup>      |

<sup>a</sup>: J=1mA/cm<sup>2</sup>. <sup>b</sup>: At max current efficiency. <sup>c</sup>: At max power off efficiency. <sup>d</sup>: At 1000nits.

(c) 35Cbz4BzCN doped TXO-TPA as the red-light emitting layer (EML).

Red TADF Conc. Scan.

The device structure is ITO/TAPC (50 nm)/mCP (10 nm)/EML (V wt %) (30 nm)/DPPS (70 nm)/LiF (0.8 nm)/Al (120 nm). According this device structure, the EML V are 1, 5 and 10 of TXO-TPA doping ratio.

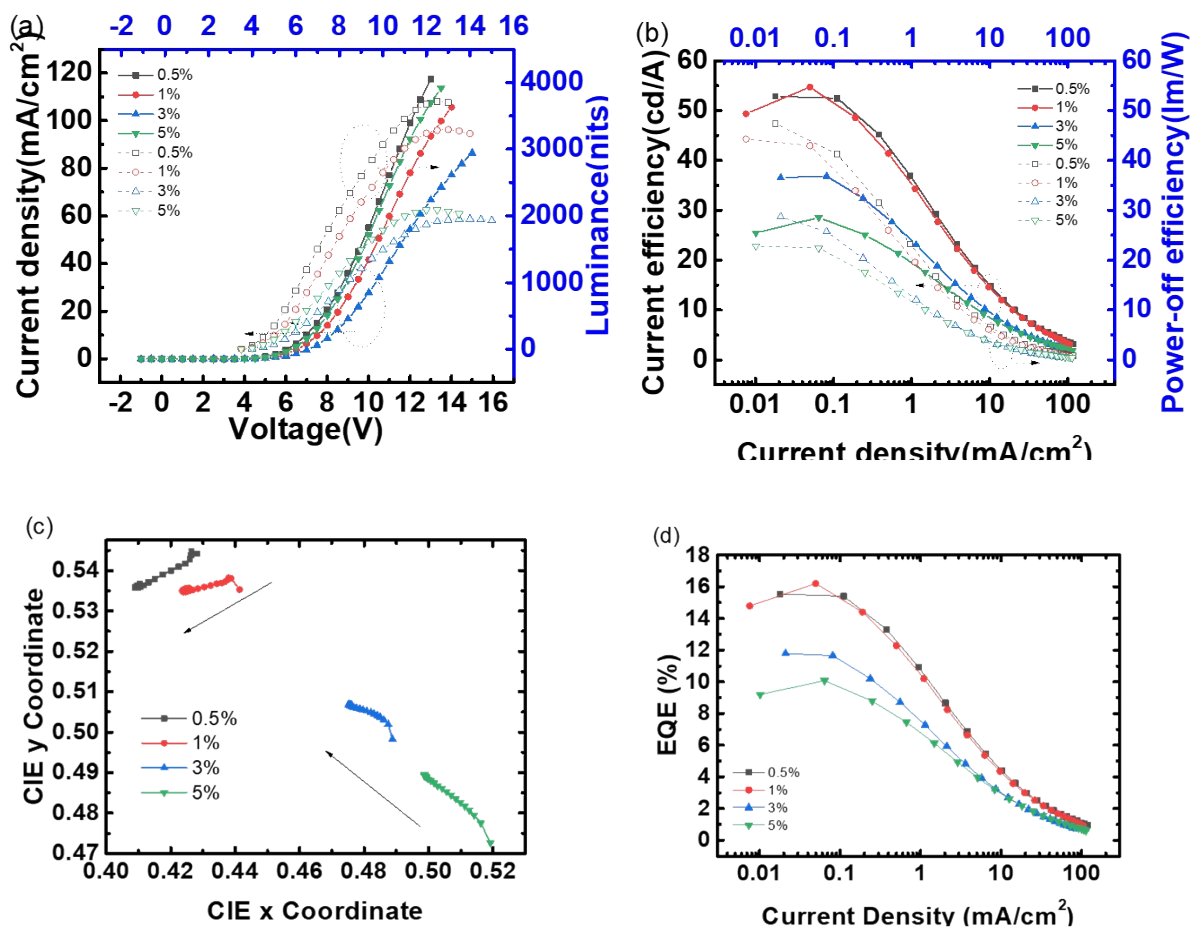

**Fig. S25** TXO-TPA dopant concentration effects on the performance of the red OLEDs (a) the J-L-V plots; (b) the current density-current efficiency-power efficiency curve; (c) CIE coordinate; (d) the current density- EQE curve.



**Table S10** TXO-TPA dopant concentration effects on the performance of the red OLEDs

| Device entry | Driving Voltage (V) <sup>a</sup> | Max luminance (nits) | CE (cd/A)                             | PE (lm/W)                             | EQE (%)                              | LT50@ 1000nits (min) |
|--------------|----------------------------------|----------------------|---------------------------------------|---------------------------------------|--------------------------------------|----------------------|
| TXO-TPA 0.5% | 5.02                             | 3710                 | 52.8 <sup>b</sup> , 21.3 <sup>d</sup> | 47.4 <sup>c</sup> , 10.9 <sup>d</sup> | 15.5 <sup>b</sup> , 6.4 <sup>d</sup> | 26 <sup>d</sup>      |
| TXO-TPA 1%   | 5.41                             | 3300                 | 54.7 <sup>b</sup> , 19.2 <sup>d</sup> | 44.3 <sup>c</sup> , 9.3 <sup>d</sup>  | 16.2 <sup>b</sup> , 5.9 <sup>d</sup> | 22 <sup>d</sup>      |
| TXO-TPA 3%   | 5.88                             | 1950                 | 36.8 <sup>b</sup> , 9.1 <sup>d</sup>  | 28.7 <sup>c</sup> , 3.4 <sup>d</sup>  | 11.8 <sup>b</sup> , 2.9 <sup>d</sup> | 17 <sup>d</sup>      |
| TXO-TPA 5%   | 5.20                             | 2090                 | 28.6 <sup>b</sup> , 7.3 <sup>d</sup>  | 22.8 <sup>c</sup> , 3.0 <sup>d</sup>  | 10.0 <sup>b</sup> , 2.5 <sup>d</sup> | 13 <sup>d</sup>      |

<sup>a</sup>: J=1mA/cm<sup>2</sup>. <sup>b</sup>: At max current efficiency. <sup>c</sup>: At max power off efficiency. <sup>d</sup>: At 1000nits.

**The device ETL thickness scan.**

The device structure is ITO/TAPC (50 nm)/mCP (10 nm)/EML (1 wt %) (30 nm)/DPPS (Y nm)/LiF (0.8 nm)/Al (120 nm). The Y are 70 nm, 75 nm and 80 nm of ETL thickness.

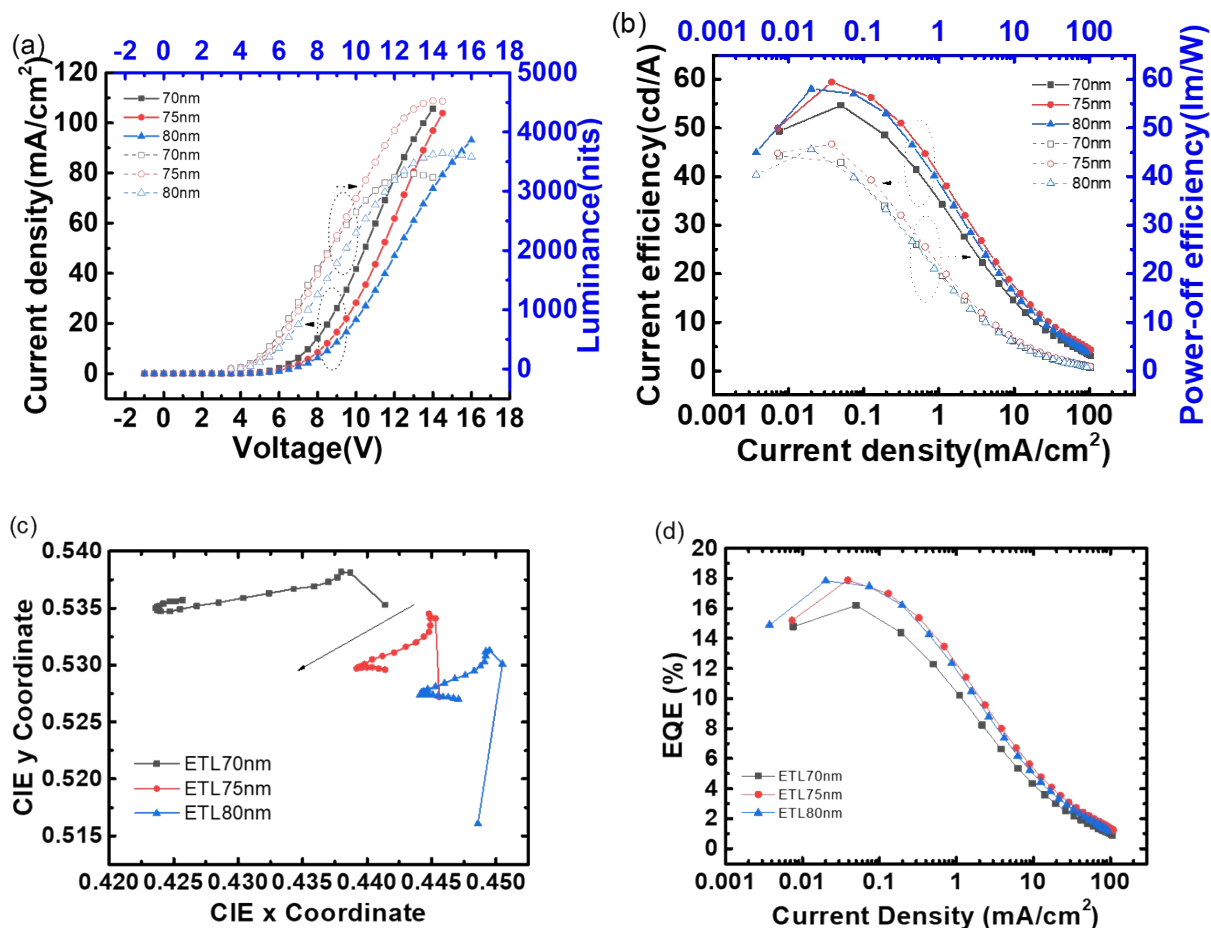

**Fig. S26** ETL thickness effects on the performance of the red TXO-TPA doped OLEDs (a) the J-L-V plots; (b) the current density-current efficiency-power efficiency curve; (c) CIE coordinate; (d) the current density- EQE curve.

**Table S11** ETL thickness effects on the performance of the red TXO-TPA doped OLEDs

| Device entry | Driving Voltage (V) <sup>a</sup> | Max luminance (nits) | CE (cd/A)                             | PE (lm/W)                             | EQE (%)                              | LT50@ 1000nits (min) |
|--------------|----------------------------------|----------------------|---------------------------------------|---------------------------------------|--------------------------------------|----------------------|
| 70nm         | 5.41                             | 3300                 | 54.7 <sup>b</sup> , 19.2 <sup>d</sup> | 44.3 <sup>c</sup> , 9.3 <sup>d</sup>  | 16.2 <sup>b</sup> , 5.9 <sup>d</sup> | 22 <sup>d</sup>      |
| 75nm         | 5.79                             | 4530                 | 59.5 <sup>b</sup> , 26.5 <sup>d</sup> | 46.7 <sup>c</sup> , 11.9 <sup>d</sup> | 17.9 <sup>b</sup> , 7.9 <sup>d</sup> | 33 <sup>d</sup>      |
| 80nm         | 6.09                             | 3640                 | 58.1 <sup>b</sup> , 23.8 <sup>d</sup> | 45.6 <sup>c</sup> , 10.0 <sup>d</sup> | 17.8 <sup>b</sup> , 7.4 <sup>d</sup> | 38 <sup>d</sup>      |

<sup>a</sup>: J=1mA/cm<sup>2</sup>. <sup>b</sup>: At max current efficiency. <sup>c</sup>: At max power off efficiency. <sup>d</sup>: At 1000nits.

**The device EML thickness scan.**

The device structure is ITO/TAPC (50 nm)/mCP (10 nm)/EML (1 wt %) (X nm)/DPPS (75 nm)/LiF (0.8 nm)/Al (120 nm). The X are 25 nm, 30 nm and 35 nm of EML thickness.

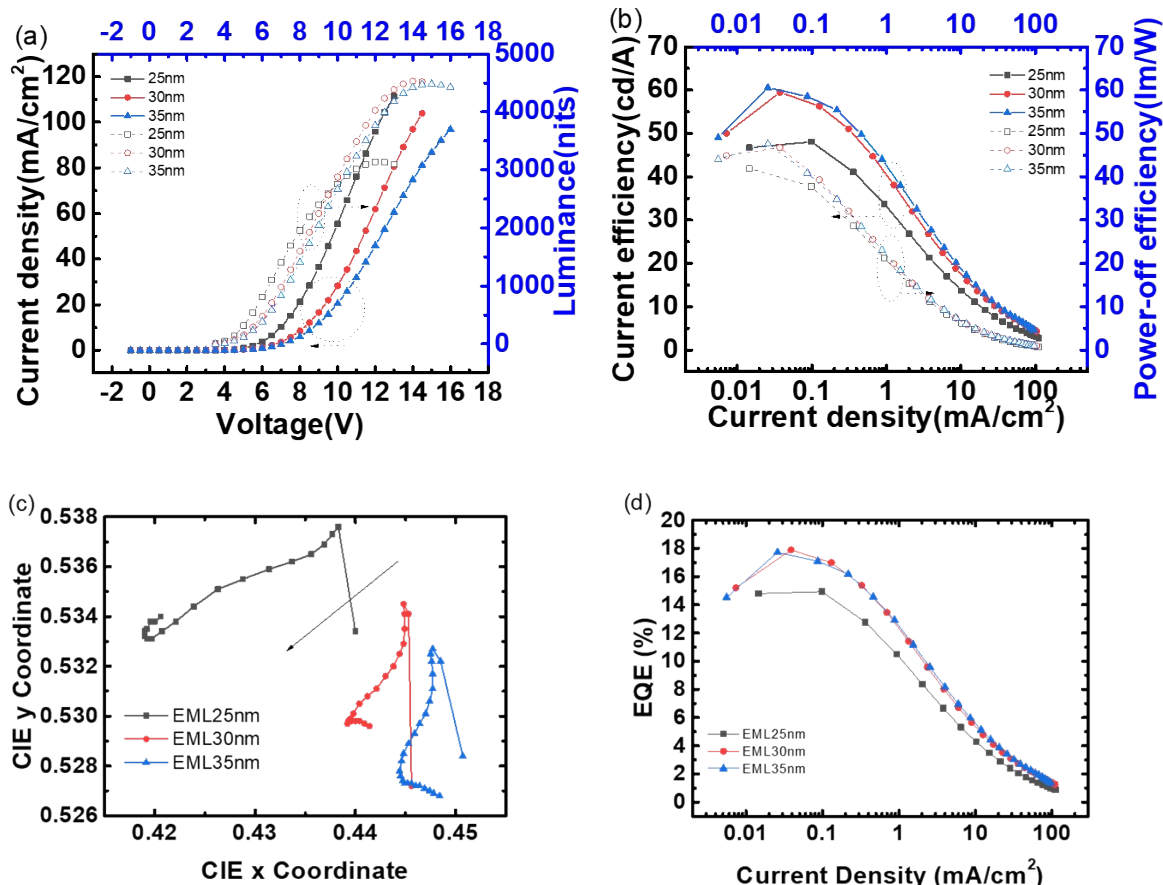

**Fig. S27** EML thickness effects on the performance of the red TXO-TPA doped OLEDs (a) the J-L-V plots; (b) the current density-current efficiency-power efficiency curve; (c) CIE coordinate; (d) the current density- EQE curve.

**Table S12** EML thickness effects on the performance of the red TXO-TPA doped OLEDs

| Device entry | Driving Voltage (V) <sup>a</sup> | Max luminance (nits) | CE (cd/A)                             | PE (lm/W)                             | EQE (%)                              | LT50@ 1000nits (min) |
|--------------|----------------------------------|----------------------|---------------------------------------|---------------------------------------|--------------------------------------|----------------------|
| EML25nm      | 5.03                             | 3140                 | 48.1 <sup>b</sup> , 18.5 <sup>d</sup> | 41.9 <sup>c</sup> , 9.3 <sup>d</sup>  | 14.9 <sup>b</sup> , 5.8 <sup>d</sup> | 22 <sup>d</sup>      |
| EML30nm      | 5.79                             | 4530                 | 59.5 <sup>b</sup> , 26.5 <sup>d</sup> | 46.7 <sup>c</sup> , 11.9 <sup>d</sup> | 17.9 <sup>b</sup> , 7.9 <sup>d</sup> | 33 <sup>d</sup>      |
| EML35nm      | 6.09                             | 4480                 | 60.6 <sup>b</sup> , 29.5 <sup>d</sup> | 47.6 <sup>c</sup> , 12.7 <sup>d</sup> | 17.7 <sup>b</sup> , 8.7 <sup>d</sup> | 38 <sup>d</sup>      |

<sup>a</sup>: J=1mA/cm<sup>2</sup>. <sup>b</sup>: At max current efficiency. <sup>c</sup>: At max power off efficiency. <sup>d</sup>: At 1000nits.

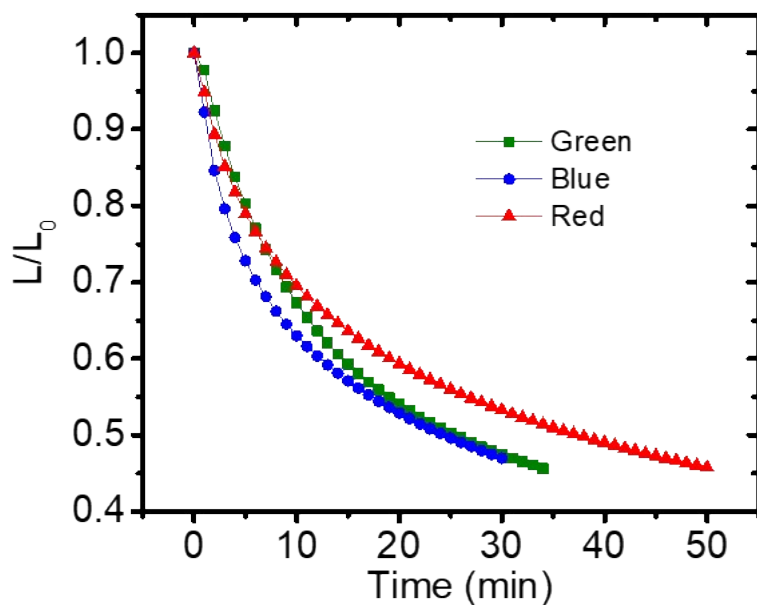

**Fig. S28** The lifetime curve of the devices at 1000 nits: (i) the green line (-■-) represents the decay of the 4CzIPN doped green TADF-OLED. The device structure is ITO/TAPC (50 nm)/mCP (10 nm)/ **35Cbz4BzCN** doped **4CzIPN** (10 wt %) (30 nm)/DPPS (65 nm)/LiF (0.8 nm)/Al (120 nm); (ii) the blue line (-●-) represents the decay of **Flrpic** doped blue PhOLED device. The device structure is ITO/TAPC (50 nm)/mCP (10 nm)/ **35Cbz4BzCN** doped **Flrpic** (20 wt %) (30 nm)/DPPS (55 nm)/LiF (0.8 nm)/Al (120 nm); (iii) the red line represents the decay of the **TXO-TPA** doped red TADF device. The device structure is ITO/TAPC (50 nm)/mCP (10 nm)/ **35Cbz4BzCN** doped **TXO-TPA** (1 wt %) (30 nm)/DPPS (80 nm)/LiF (0.8 nm)/Al (120 nm). The sample devices had to expose to air during the change of the mask.

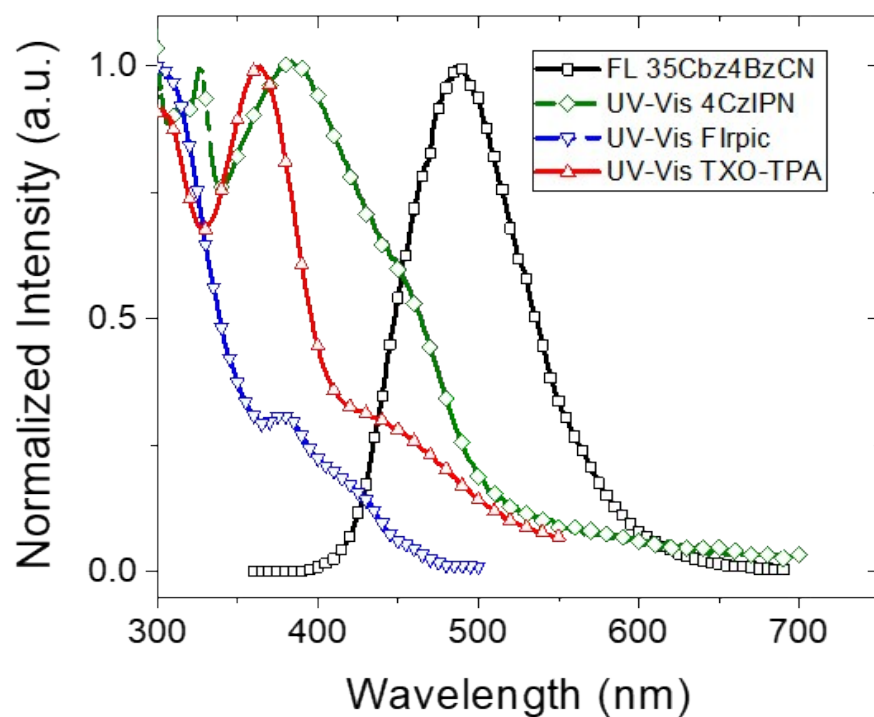

**Fig. S29** Spectral overlap analysis of **35Cbz4BzCN** with the blue, green, and red emitters of Flrpic, 4CzIPN, and TXO-TPA. Since the emission spectrum of **35Cbz4BzCN**'s has the  $\lambda_{\text{max}}$  longer than 490 nm (2.5 eV), energy transfer through FRET to Flrpic and perhaps to 4CzIPN may be less efficient.
